# Supplementary material for: Arene displacement, C–H activation and acetonitrile insertion reactions enabled by coordination of a functionalized iminophosphorane to a RuII–p-cymene scaffold
Source: Royal Society of Chemistry journal article supplement (doi:10.1039/d4dt00940a), 2024-01-01
Supplement: d4dt00940a1.pdf [file d4dt00940a1.pdf]

## Supporting Information

### **Arene displacement, C-H activation and acetonitrile insertion reactions enabled by coordination of a functionalized iminophosphorane to Ru<sup>II</sup>-*p*-cymene scaffold**

Rani Gourkhede,<sup>†</sup> Bhupinder Kaur,<sup>†</sup> Basvaraj S. Kote,<sup>†</sup> Maravanji S. Balakrishna<sup>\*†</sup>

<sup>†</sup>Phosphorus Laboratory, Department of Chemistry, Indian Institute of Technology Bombay, Powai, Mumbai, 400076, India

#### **Table of Content**

|                                                                      |         |
|----------------------------------------------------------------------|---------|
| Crystal structure determination of complexes <b>2-5</b> and <b>7</b> | S2      |
| Crystallographic information for compounds <b>2-5</b> and <b>7</b>   | S3      |
| Selected bond lengths and bond angles of complex <b>2</b>            | S4      |
| NMR, HRMS and FT-IR spectra of compounds <b>1-7</b>                  | S4-S30  |
| NMR spectral data of catalytic products                              | S31-S33 |
| NMR spectra of substrates                                            | S34-S48 |
| References                                                           | S48     |

### Crystal structure determination of complexes 2-5

Single-crystal X-ray diffraction suitable crystal of compounds **2-5** and **7** was mounted on a cryoloop with a drop of paratone oil and placed in the cold nitrogen stream on a Bruker D8 Venture diffractometer. Data was collected at 150(2) K, 300 K or 100 K using Bruker D8 Venture diffractometer with a graphite-monochromated Mo-K $\alpha$  radiation ( $\lambda = 0.71073 \text{ \AA}$ ) with ‘phi–omega scan’ techniques and were scaled and reduced using CrysAlisPro Red 171.41\_64.93a software. The crystal structures of all the compounds were solved using Olex21.5<sup>1</sup> with the ShelXT<sup>2</sup> structure solution program using intrinsic phasing and refined with the ShelXL<sup>3</sup> refinement package using least-square minimization. All non-hydrogen atoms were refined anisotropically. Hydrogen atoms were placed in calculated positions and included as riding contributions, with isotropic displacement parameters tied to those of the attached non-hydrogen atoms. Crystallographic data for the structures reported in this paper have been deposited with the Cambridge Crystallographic Data Centre as supplementary publication no. CCDC 2302590 (compound **3**), 2302591 (compound **4**), 2302664 (compound **5**) and 2344271 (compound **7**). The details of X-ray structural determinations are given in Table S1.

### Crystallographic information of complexes 2-5 and 7

**Table S1.** Crystallographic information of complexes 2-5 and 7

|                                          | <b>2</b>                                                           | <b>3.(0.9CH<sub>2</sub>Cl<sub>2</sub>)(1.6C<sub>4</sub>H<sub>10</sub>O)</b>               | <b>4.(1.21CH<sub>2</sub>Cl<sub>2</sub>)</b>                                      | <b>5.(1.6CH<sub>2</sub>Cl<sub>2</sub>)</b>                                                                              | <b>7</b>                                                           |
|------------------------------------------|--------------------------------------------------------------------|-------------------------------------------------------------------------------------------|----------------------------------------------------------------------------------|-------------------------------------------------------------------------------------------------------------------------|--------------------------------------------------------------------|
| <b>Empirical formula</b>                 | C <sub>68</sub> H <sub>63</sub> Cl <sub>2</sub> NP <sub>2</sub> Ru | C <sub>65.3</sub> H <sub>65.8</sub> Cl <sub>2.8</sub> NO <sub>2.6</sub> P <sub>2</sub> Ru | C <sub>59.23</sub> H <sub>50.46</sub> Cl <sub>3.46</sub> NO<br>P <sub>2</sub> Ru | C <sub>67.6</sub> H <sub>64.2</sub> B <sub>2</sub> Cl <sub>3.2</sub> F <sub>8</sub> N <sub>5</sub><br>P <sub>2</sub> Ru | C <sub>41</sub> H <sub>41</sub> Cl <sub>2</sub> NP <sub>2</sub> Ru |
| <b>Formula weight</b>                    | 1128.18                                                            | 1169.039                                                                                  | 1077.85                                                                          | 1396.793                                                                                                                | 781.66                                                             |
| <b>T (K)</b>                             | 100                                                                | 150                                                                                       | 300                                                                              | 150                                                                                                                     | 150                                                                |
| <b>Cryst. System</b>                     | triclinic                                                          | triclinic                                                                                 | monoclinic                                                                       | monoclinic                                                                                                              | monoclinic                                                         |
| <b>Space group</b>                       | P-1                                                                | P-1                                                                                       | P 2 <sub>1</sub> /c                                                              | P 2 <sub>1</sub> /c                                                                                                     | P 2 <sub>1</sub> /c                                                |
| <b>a/Å</b>                               | 15.7093(6)                                                         | 13.1607(2)                                                                                | 14.4145(8)                                                                       | 13.422(4)                                                                                                               | 18.7777(2)                                                         |
| <b>b/Å</b>                               | 19.6268(7)                                                         | 13.4638(3)                                                                                | 15.8158(8)                                                                       | 21.209(5)                                                                                                               | 11.3055(10)                                                        |
| <b>c/Å</b>                               | 20.6953(10)                                                        | 18.5572(3)                                                                                | 23.9074(13)                                                                      | 24.410(47)                                                                                                              | 17.3485(2)                                                         |
| <b>α/°</b>                               | 75.523(4)                                                          | 74.144(2)                                                                                 | 90                                                                               | 90                                                                                                                      | 90                                                                 |
| <b>β/°</b>                               | 76.473(4)                                                          | 70.026(2)                                                                                 | 102.198                                                                          | 99.495(11)                                                                                                              | 100.6520(10)                                                       |
| <b>γ/°</b>                               | 89.531(3)                                                          | 67.700(2)                                                                                 | 90                                                                               | 90                                                                                                                      | 90                                                                 |
| <b>V, Å<sup>3</sup></b>                  | 5998.3(5)                                                          | 2820.02(11)                                                                               | 5327.3(5)                                                                        | 6854(3)                                                                                                                 | 3619.47                                                            |
| <b>Z</b>                                 | 2                                                                  | 2                                                                                         | 4                                                                                | 4                                                                                                                       | 4                                                                  |
| <b>ρ<sub>calc</sub> g/cm<sup>3</sup></b> | 1.343                                                              | 1.376                                                                                     | 1.344                                                                            | 1.354                                                                                                                   | 1.434                                                              |
| <b>μ (Mo Ka), mm<sup>-1</sup></b>        | 0.535                                                              | 0.514                                                                                     | 0.568                                                                            | 0.465                                                                                                                   | 0.700                                                              |
| <b>F(000)</b>                            | 2512.0                                                             | 1214.0                                                                                    | 2215.0                                                                           | 2860.0                                                                                                                  | 1608.0                                                             |
| <b>crystal size, mm</b>                  | 0.056 x 0.043 x<br>0.024                                           | 0.089 × 0.078 × 0.045                                                                     | 0.091 × 0.071 ×<br>0.046                                                         | 0.090 × 0.068 ×<br>0.036                                                                                                | 0.089 × 0.073 ×<br>0.043                                           |
| <b>2θ range, deg</b>                     | 3.336 to 50                                                        | 3.642 to 60                                                                               | 3.678 to 49.998                                                                  | 3.78 to 50                                                                                                              | 4.414 to 59.996                                                    |
| <b>Refl. collected</b>                   | 54698                                                              | 165754                                                                                    | 98307                                                                            | 155476                                                                                                                  | 82029                                                              |
| <b>Indep. reflections</b>                | 20861 [R <sub>int</sub> =<br>0.0670]                               | 16437 [R <sub>int</sub> = 0.0632]                                                         | 9368 [R <sub>int</sub> =<br>0.1146]                                              | 12061 [R <sub>int</sub> = 0.1602]                                                                                       | 10519 [R <sub>int</sub> = 0.0658]                                  |
| <b>Goodness-of-fit on F<sup>2</sup></b>  | 1.037                                                              | 1.025                                                                                     | 1.064                                                                            | 1.057                                                                                                                   | 1.035                                                              |
| <b>R<sub>1</sub></b>                     | 0.1155                                                             | 0.0431                                                                                    | 0.0776                                                                           | 0.0664                                                                                                                  | 0.0485                                                             |
| <b>wR<sub>2</sub></b>                    | 0.2104                                                             | 0.0918                                                                                    | 0.1317                                                                           | 0.1342                                                                                                                  | 0.0946                                                             |

**Table S2.** Selected bond lengths and bond angles of compound **2**

| Bond distance (Å) | <b>2</b>   | Bond angles (°) | <b>2</b> |
|-------------------|------------|-----------------|----------|
| N1–P1             | 1.524(4)   | N1–P1–C46       | 109.0(3) |
| P1–C46            | 1.838(6)   | P1–C46–P2       | 132.6(3) |
| C46–P2            | 1.837(6)   | P2–Ru1–C11      | 84.85(5) |
| Ru1–P2            | 2.3662(16) | P2–Ru1–C12      | 88.21(5) |
| Ru1–C11           | 2.3942(15) | C11–Ru1–C12     | 88.09(5) |
| Ru1–C12           | 2.4222(16) |                 |          |

**NMR and HRMS spectra of compounds 1-7**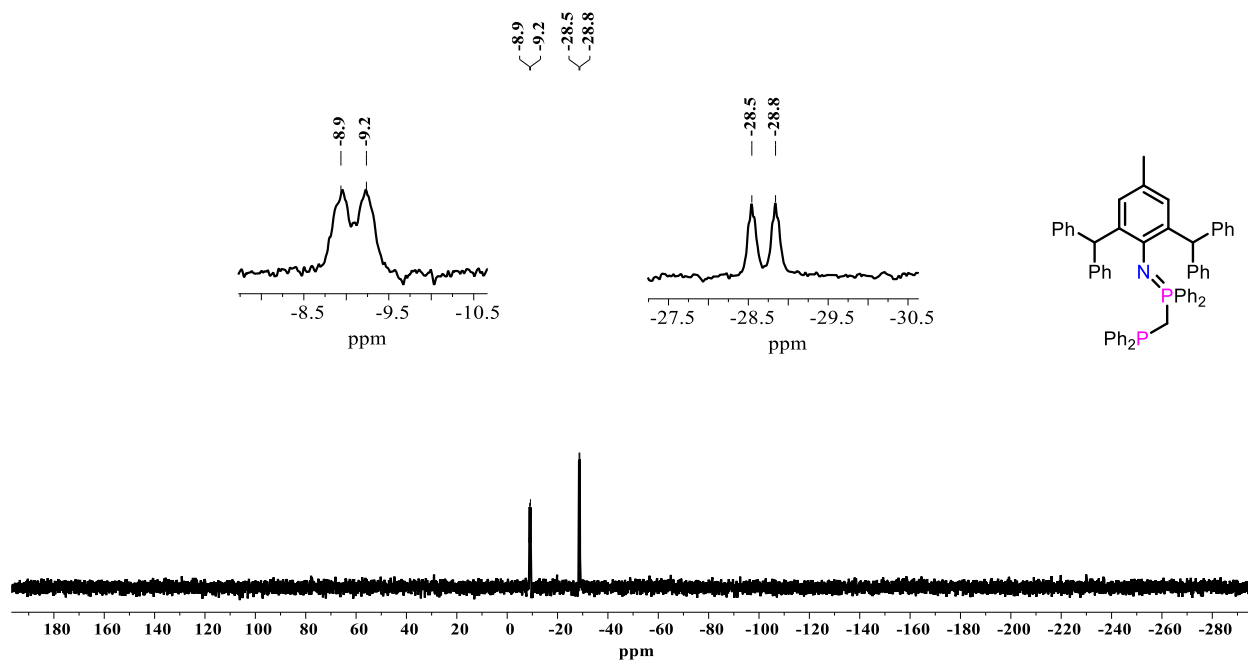**Figure S1.**  $^{31}\text{P}\{^1\text{H}\}$  NMR spectrum of **1** in  $\text{CDCl}_3$  (202 MHz).

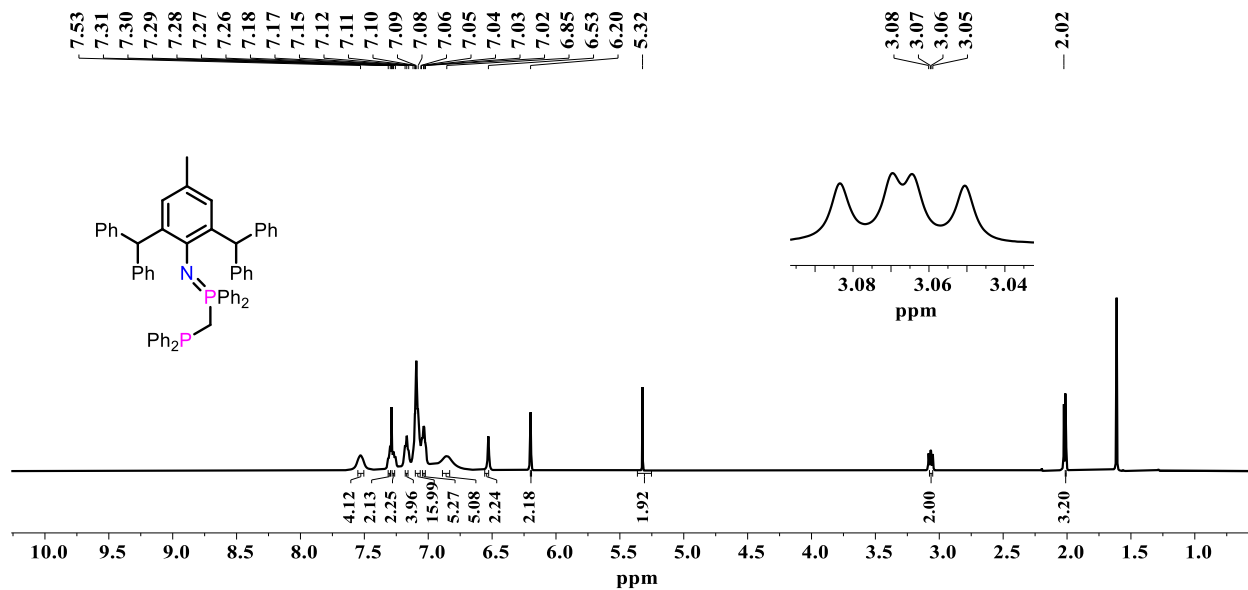

Figure S2.  $^1\text{H}$  NMR spectrum of **1** in  $\text{CDCl}_3$  (500 MHz).

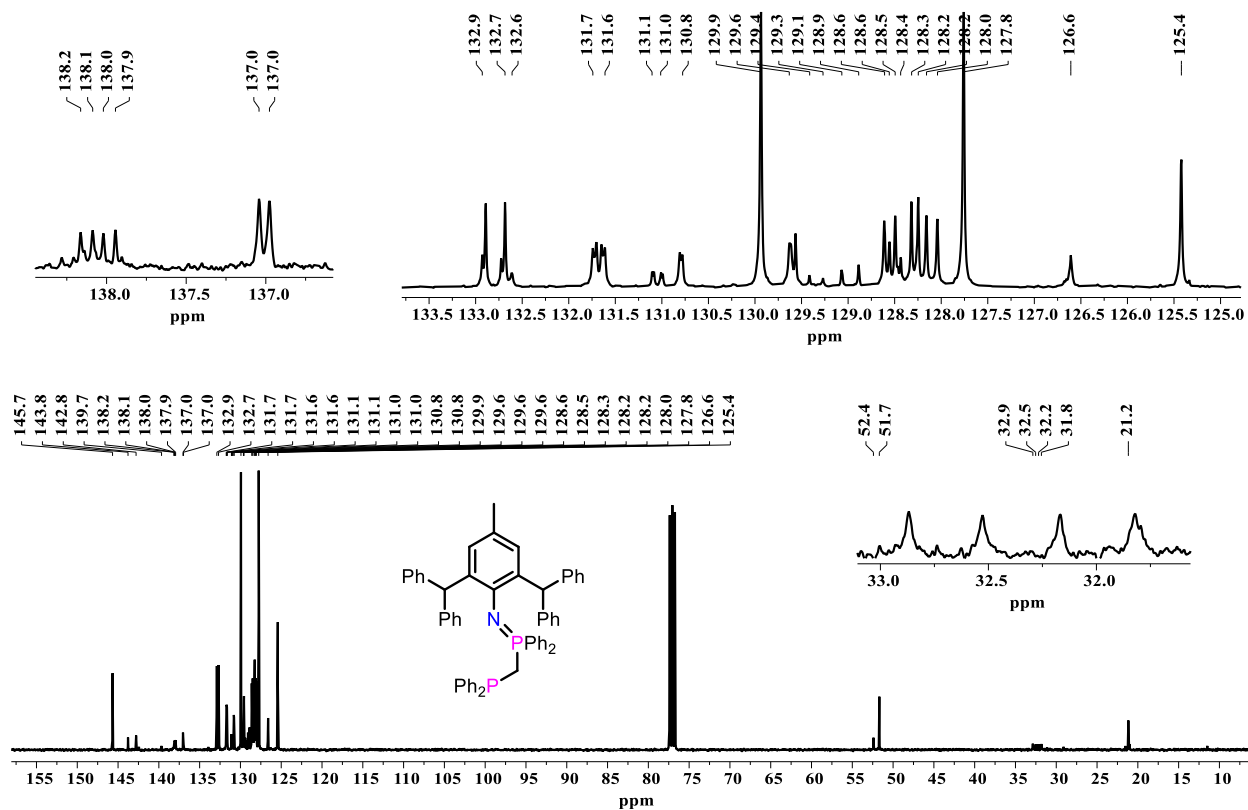

Figure S3.  $^{13}\text{C}\{^1\text{H}\}$  NMR spectrum of **1** in  $\text{CDCl}_3$  (101 MHz).

DEPARTMENT OF CHEMISTRY, I.I.T.(B)

Analysis Info

Analysis Name D:\Data\MAY-2022\MSB-RG-A-4.d  
 Method Naformat\_pos\_1000B.m  
 Sample Name MSB-RG-A-4  
 Comment C58H49NP2

Acquisition Date 5/17/2022 7:41:45 PM

Operator MSB\_IN  
 Instrument maXis impact 282001.00081

Acquisition Parameter

|             |            |                      |          |                  |           |
|-------------|------------|----------------------|----------|------------------|-----------|
| Source Type | ESI        | Ion Polarity         | Positive | Set Nebulizer    | 0.3 Bar   |
| Focus       | Not active | Set Capillary        | 3700 V   | Set Dry Heater   | 180 °C    |
| Scan Begin  | 50 m/z     | Set End Plate Offset | -500 V   | Set Dry Gas      | 4.0 l/min |
| Scan End    | 1000 m/z   | Set Charging Voltage | 2000 V   | Set Divert Valve | Source    |
|             |            | Set Corona           | 0 nA     | Set APCI Heater  | 0 °C      |

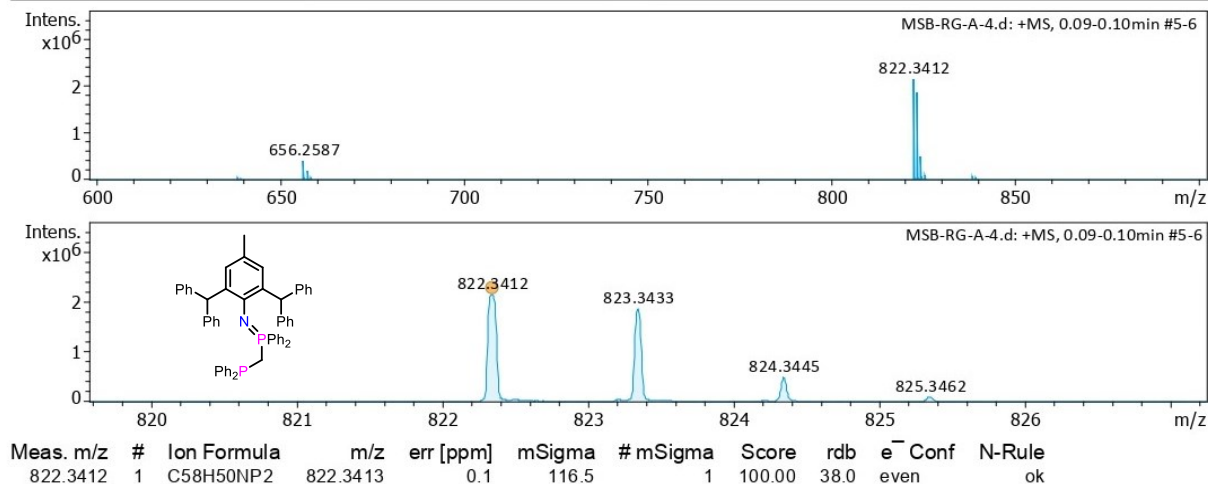

Figure S4. HRMS spectrum of 1.

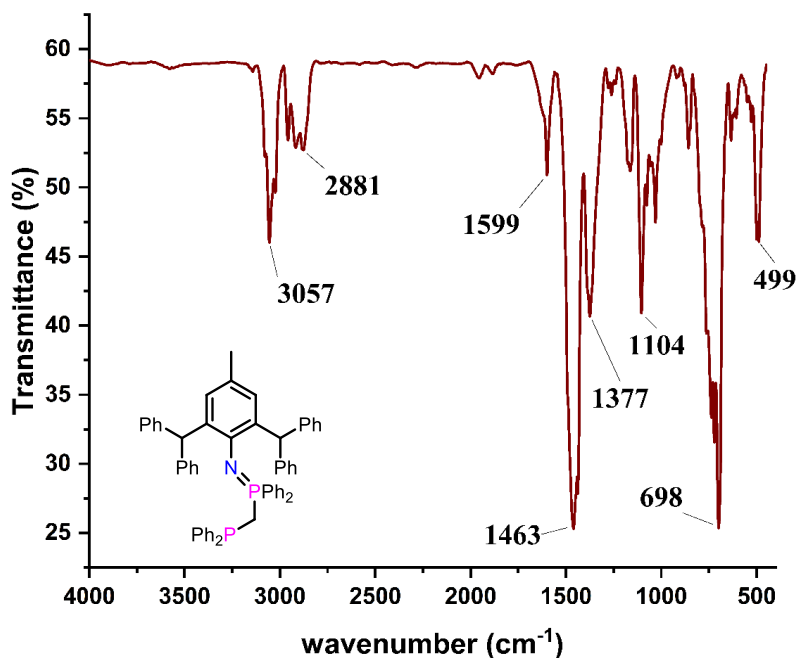

Figure S5. FT-IR spectrum of 1.

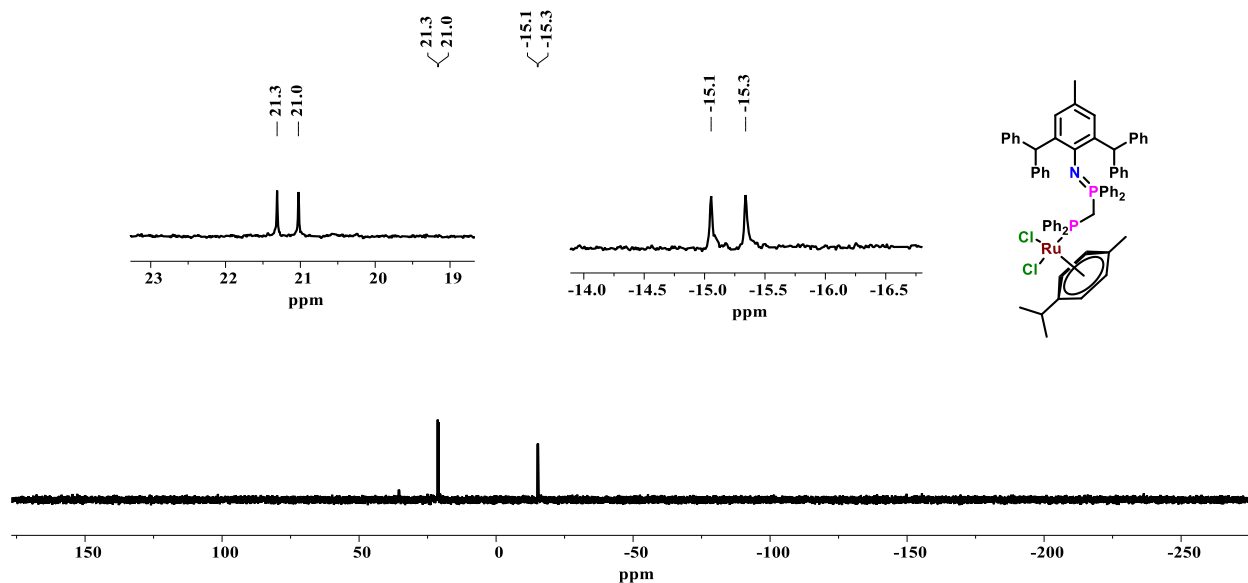

Figure S6.  $^{31}\text{P}\{^1\text{H}\}$  NMR spectrum of **2** in  $\text{CDCl}_3$  (162 MHz).

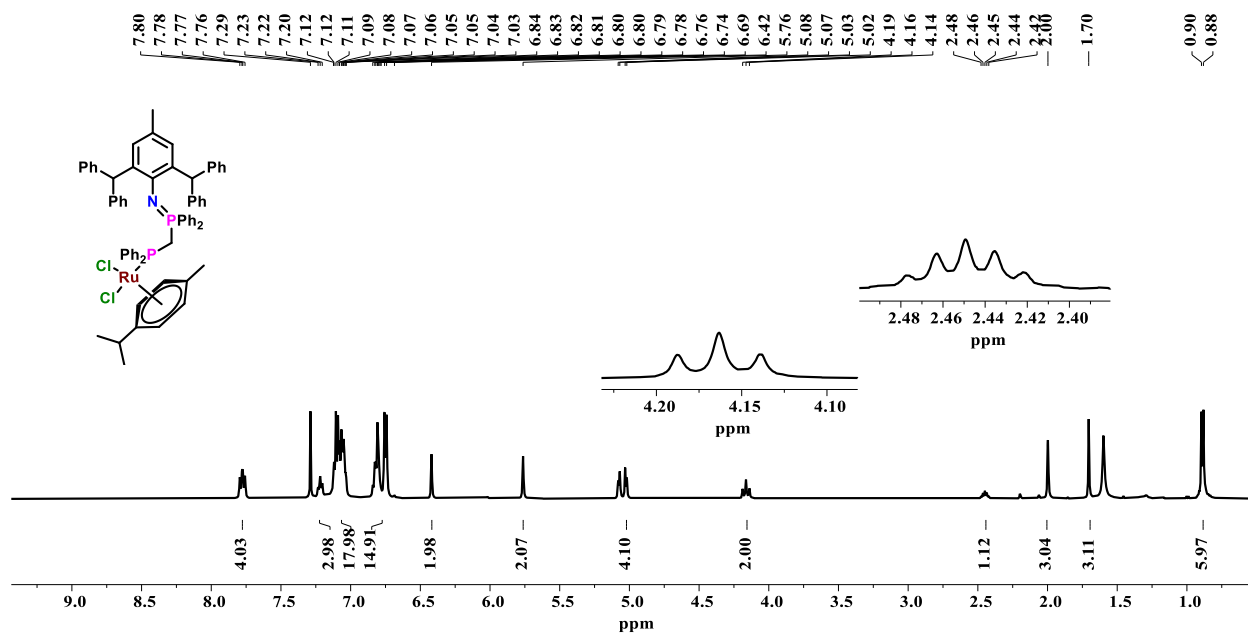

Figure S7.  $^1\text{H}$  NMR spectrum of **2** in  $\text{CDCl}_3$  (400 MHz).

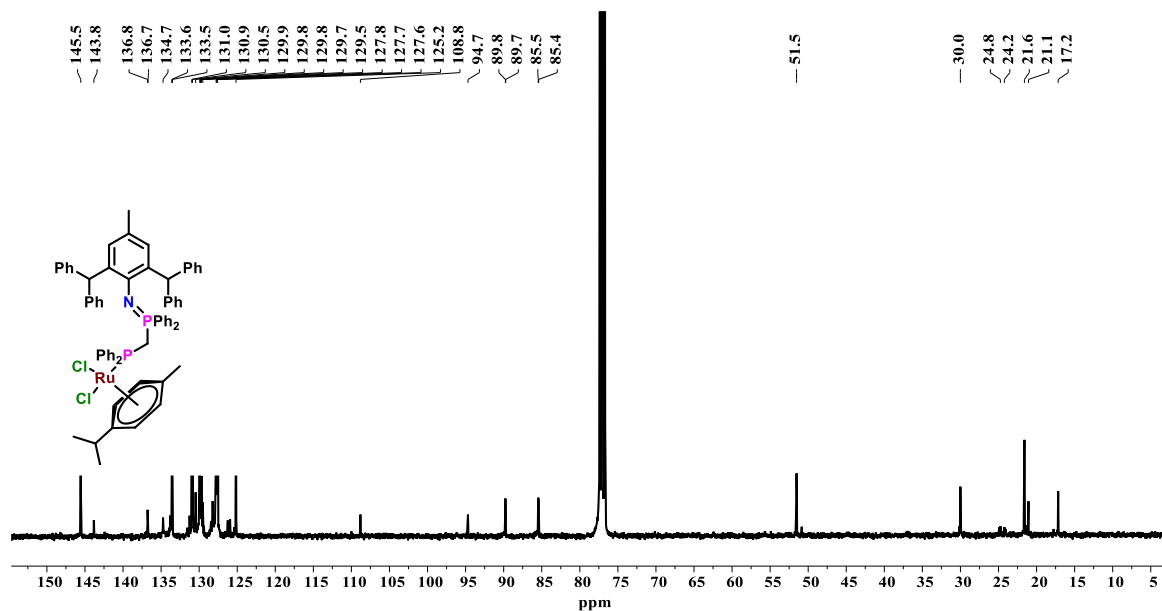

Figure S8.  $^{13}\text{C}\{^1\text{H}\}$  NMR spectrum of **2** in  $\text{CDCl}_3$  (101 MHz).

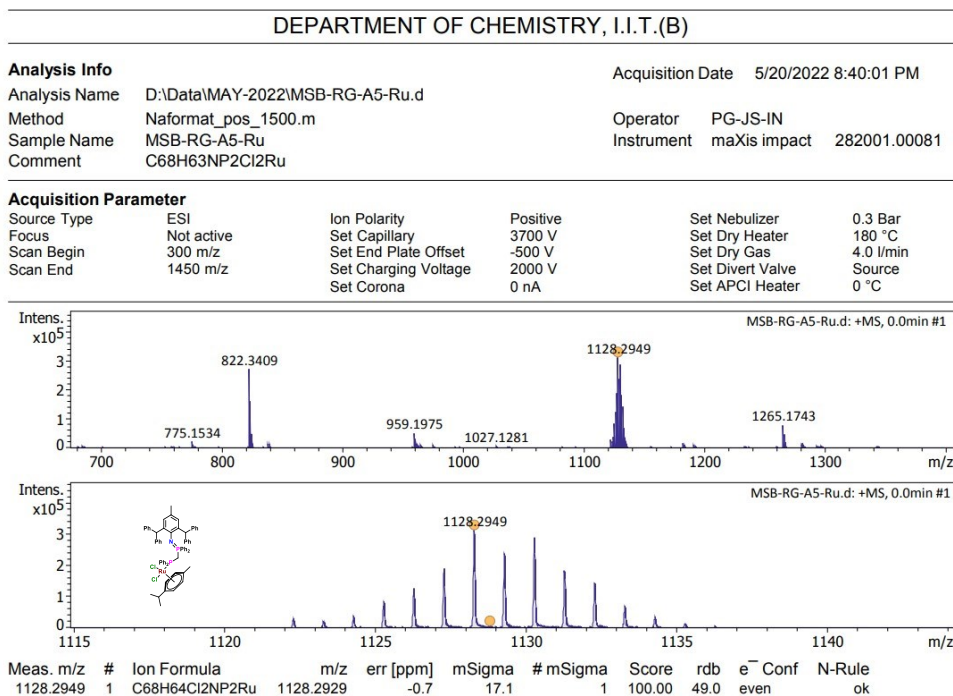

Figure S9. HRMS spectrum of **2**.



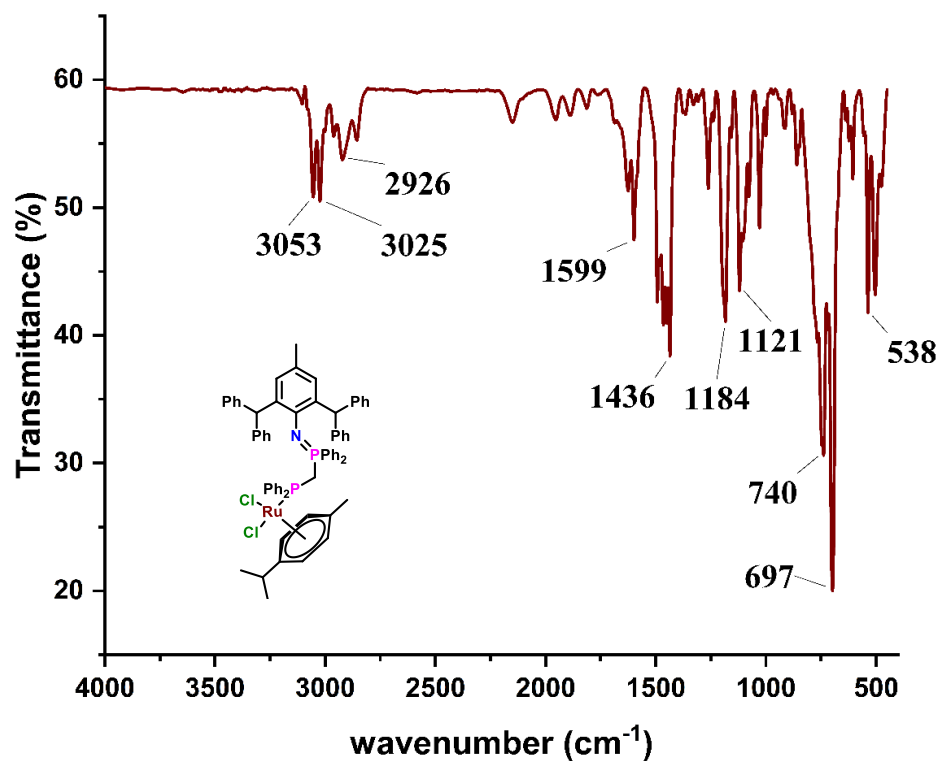

Figure S10. FT-IR spectrum of **2**.

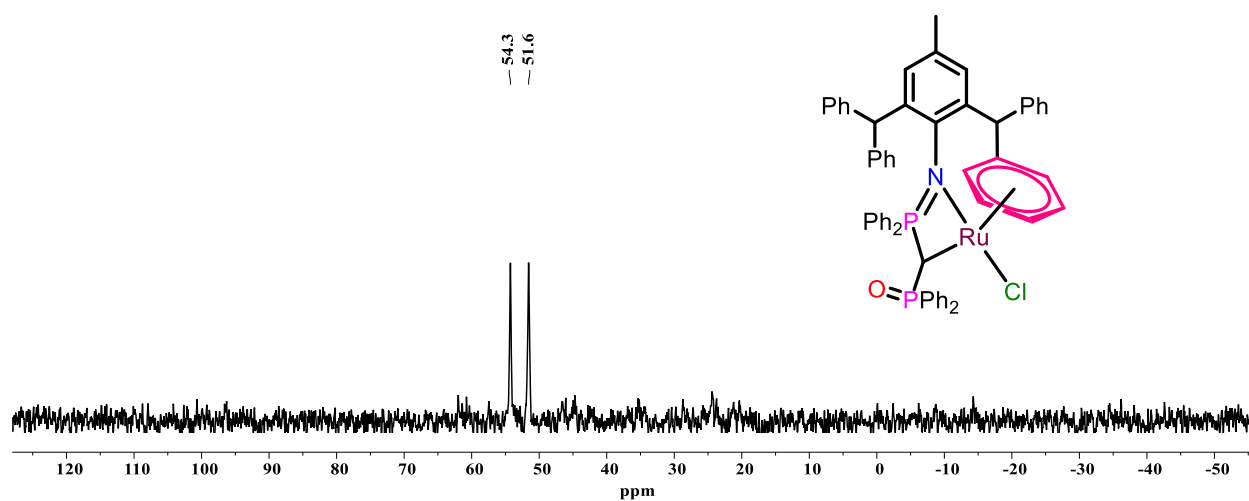

Figure S11.  $^{31}\text{P}\{^1\text{H}\}$  NMR spectrum of **3** in  $\text{CDCl}_3$  (162 MHz).

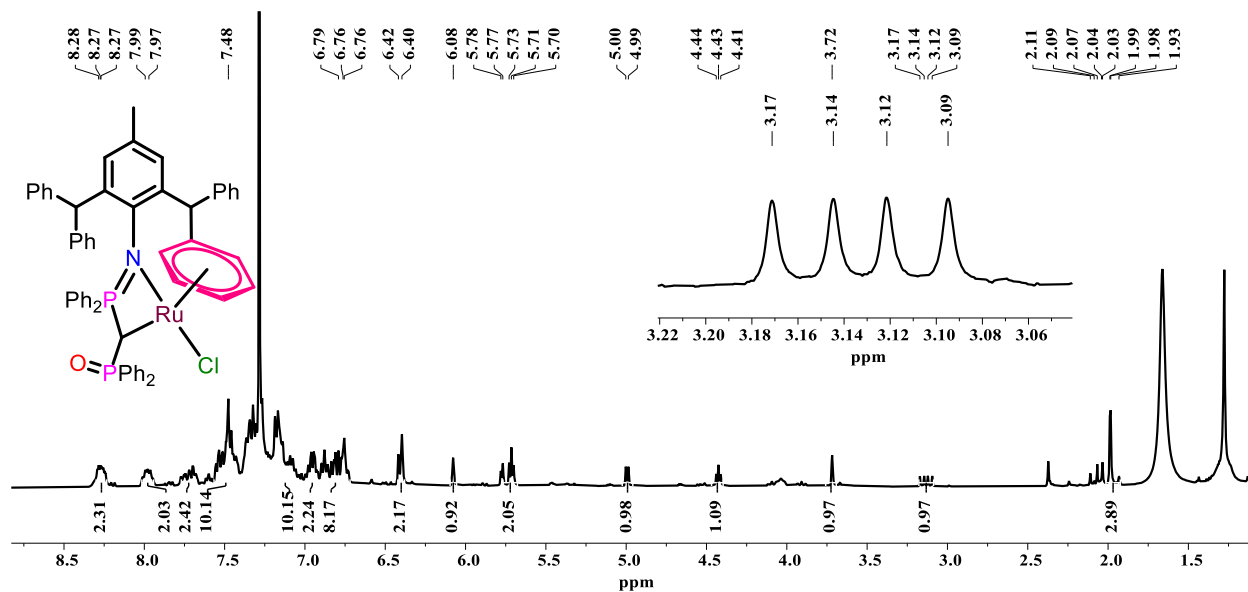

Figure S12.  $^1\text{H}$  NMR spectrum of **2** in  $\text{CDCl}_3$  (400 MHz).

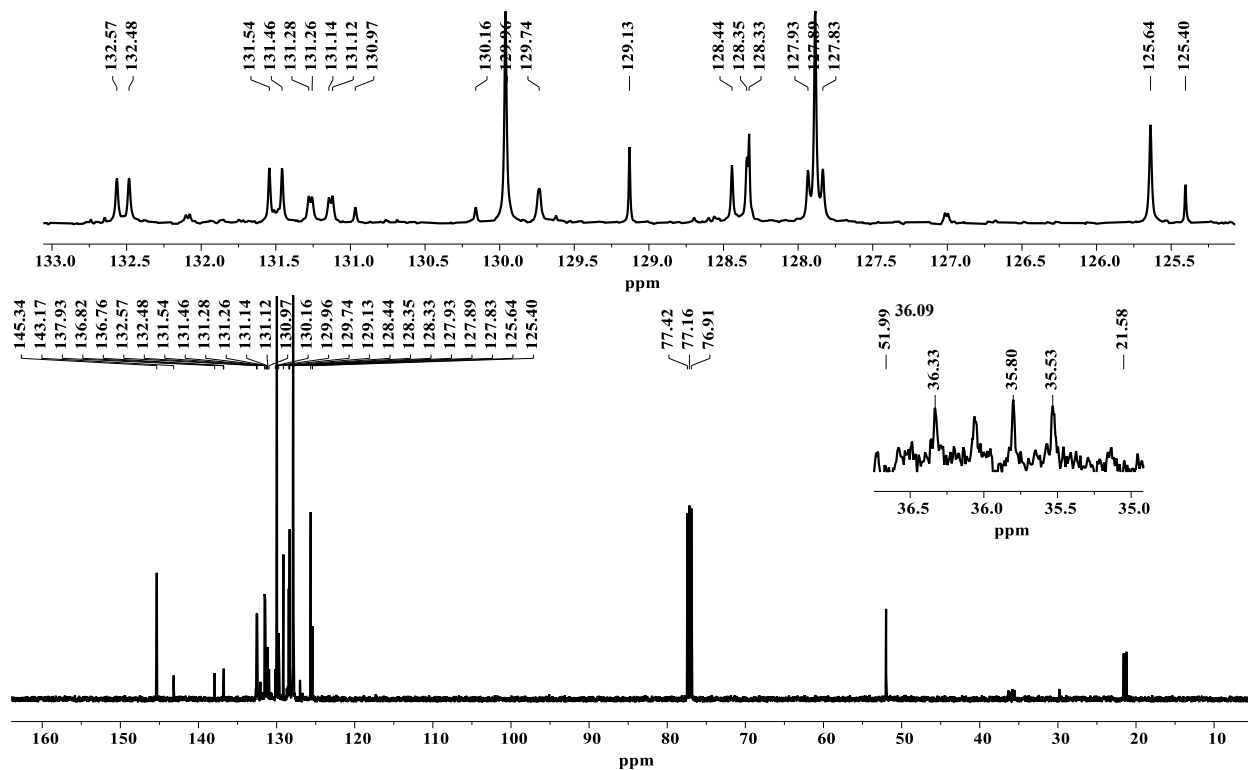

Figure S13.  $^{13}\text{C}\{^1\text{H}\}$  NMR spectrum of **3** in  $\text{CDCl}_3$  (126 MHz).

DEPARTMENT OF CHEMISTRY, I.I.T.(B)

Analysis Info

Analysis Name D:\Data\JULY-2022\MSB-RG-A-12.d  
 Method Naformat\_pos\_1500.m  
 Sample Name MSB-RG-A-12  
 Comment C58H48NP2O1Ru1Cl1

Acquisition Date 7/19/2022 7:28:29 PM

Operator MSB-IN  
 Instrument maXis impact 282001.00081

Acquisition Parameter

|             |            |                      |          |                  |           |
|-------------|------------|----------------------|----------|------------------|-----------|
| Source Type | ESI        | Ion Polarity         | Positive | Set Nebulizer    | 0.3 Bar   |
| Focus       | Not active | Set Capillary        | 3700 V   | Set Dry Heater   | 180 °C    |
| Scan Begin  | 100 m/z    | Set End Plate Offset | -500 V   | Set Dry Gas      | 4.0 l/min |
| Scan End    | 1500 m/z   | Set Charging Voltage | 2000 V   | Set Divert Valve | Source    |
|             |            | Set Corona           | 0 nA     | Set APCI Heater  | 0 °C      |

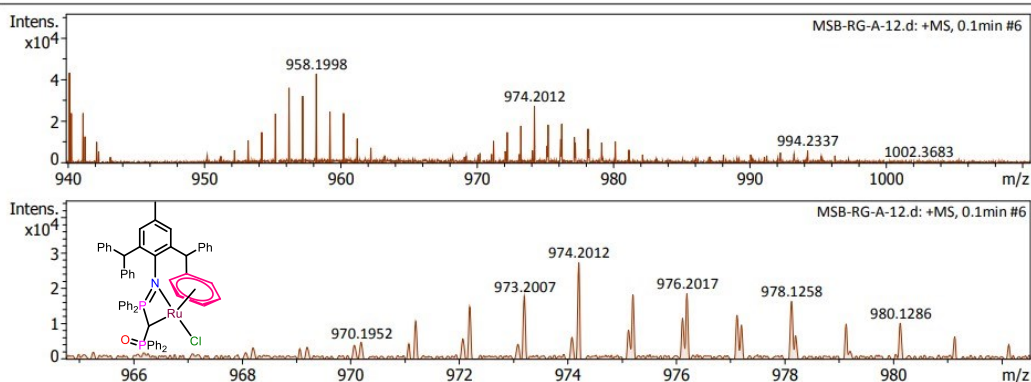

| Meas. m/z | # | Ion Formula    | m/z      | err [ppm] | mSigma | # mSigma | Score  | rdb  | e <sup>-</sup> Conf | N-Rule |
|-----------|---|----------------|----------|-----------|--------|----------|--------|------|---------------------|--------|
| 974.2012  | 1 | C58H49CINOP2Ru | 974.2016 | 1.7       | 59.2   | 1        | 100.00 | 44.0 | even                | ok     |

Figure S14. HRMS spectrum of 3.

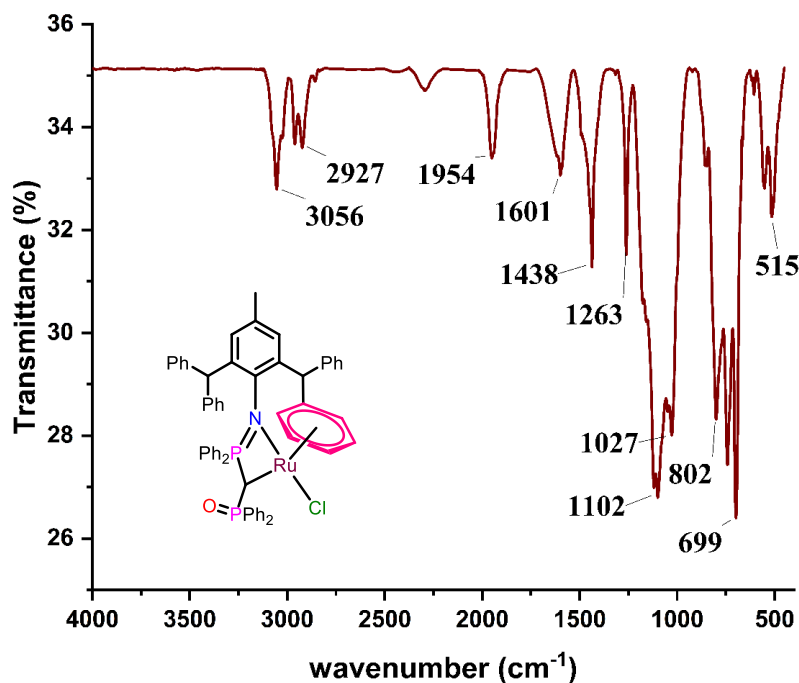

Figure S15. FT-IR spectrum of 3.

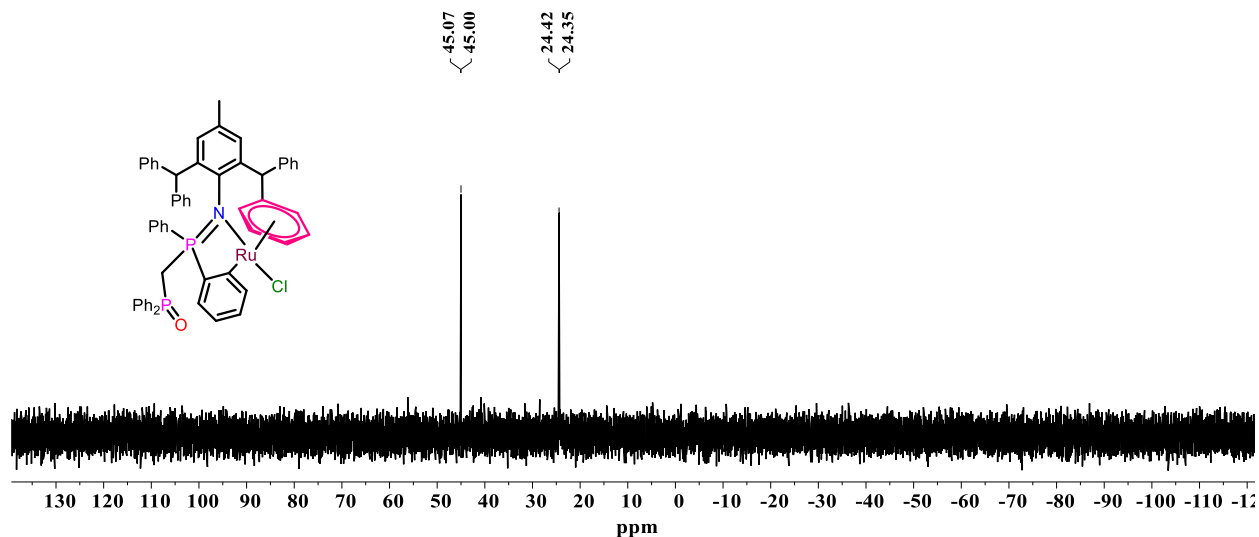

Figure S16.  $^{31}\text{P}\{^1\text{H}\}$  NMR spectrum of **4** in  $\text{CDCl}_3$  (202 MHz)

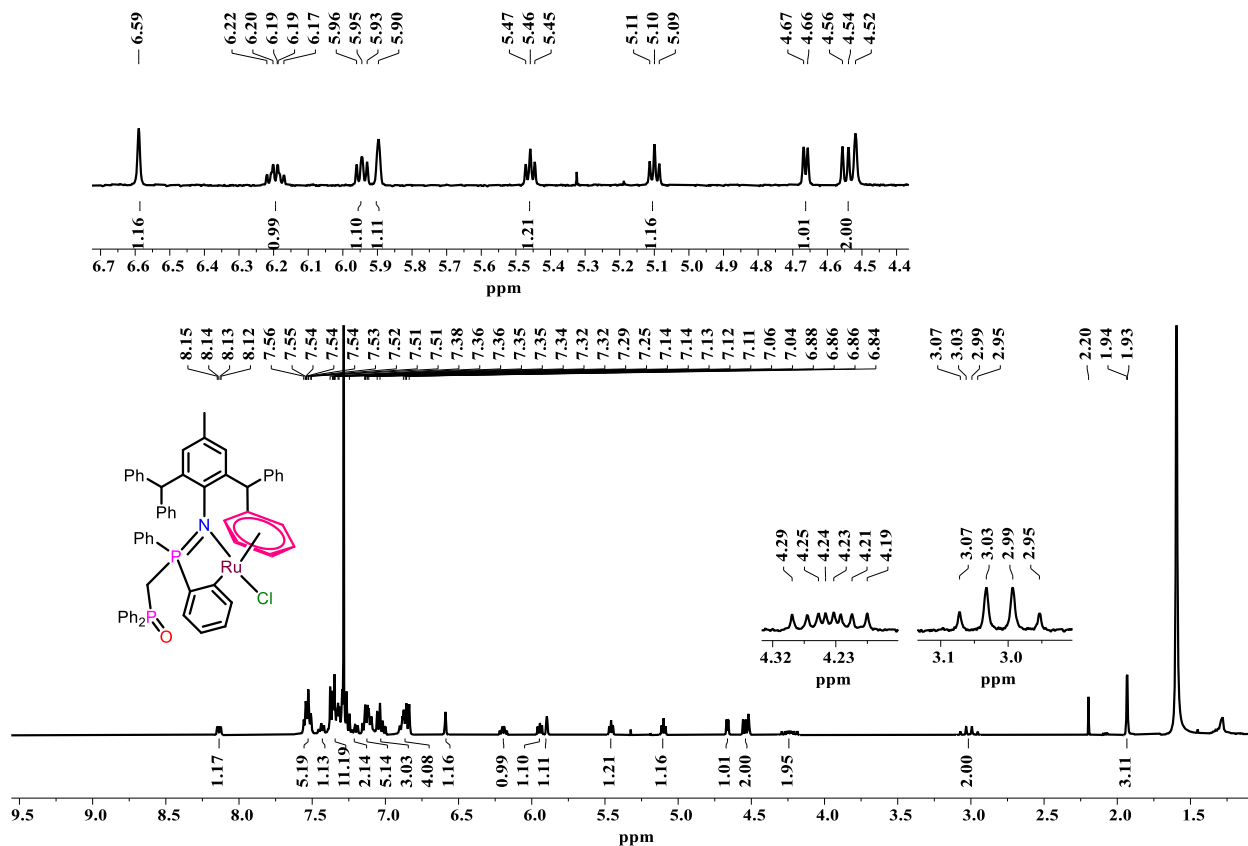

Figure S17.  $^1\text{H}$  NMR spectrum of **4** in  $\text{CDCl}_3$  (400 MHz).

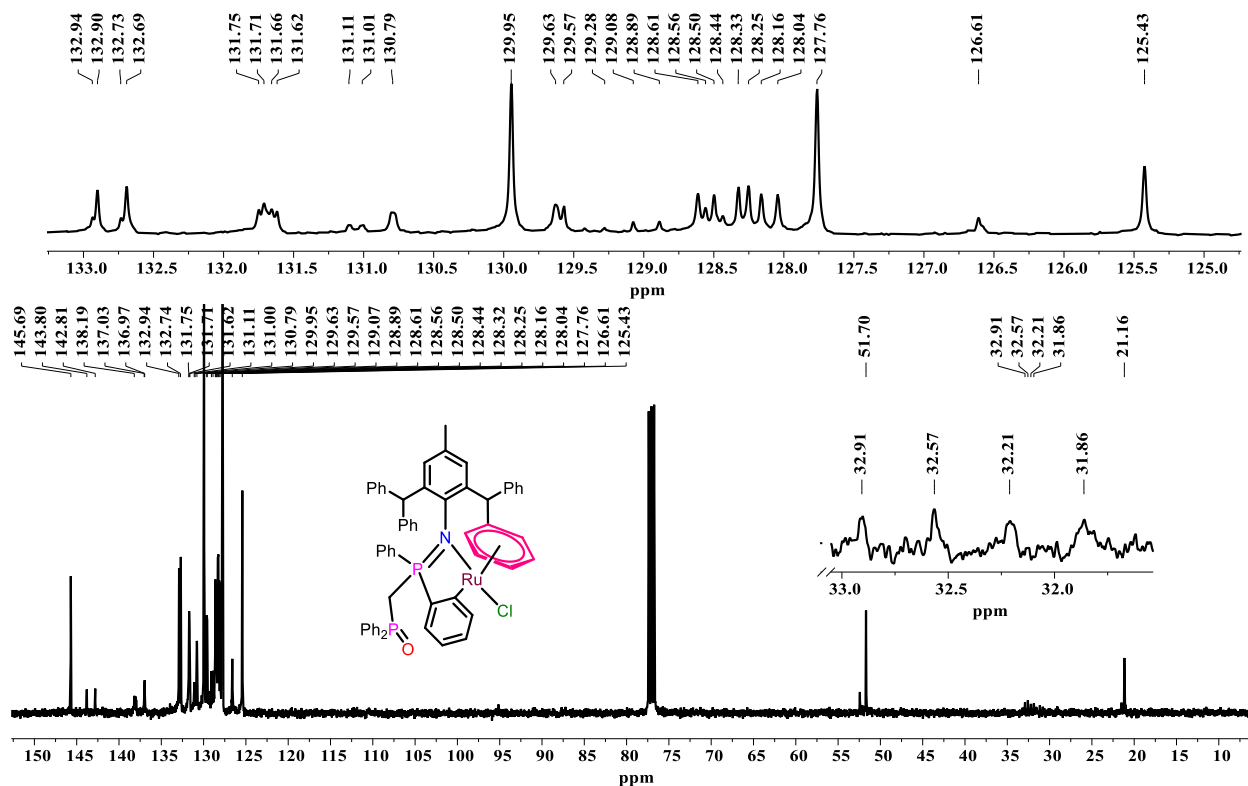

**Figure S18.**  $^{13}\text{C}$  NMR spectrum of **4** in  $\text{CDCl}_3$  (202 MHz).

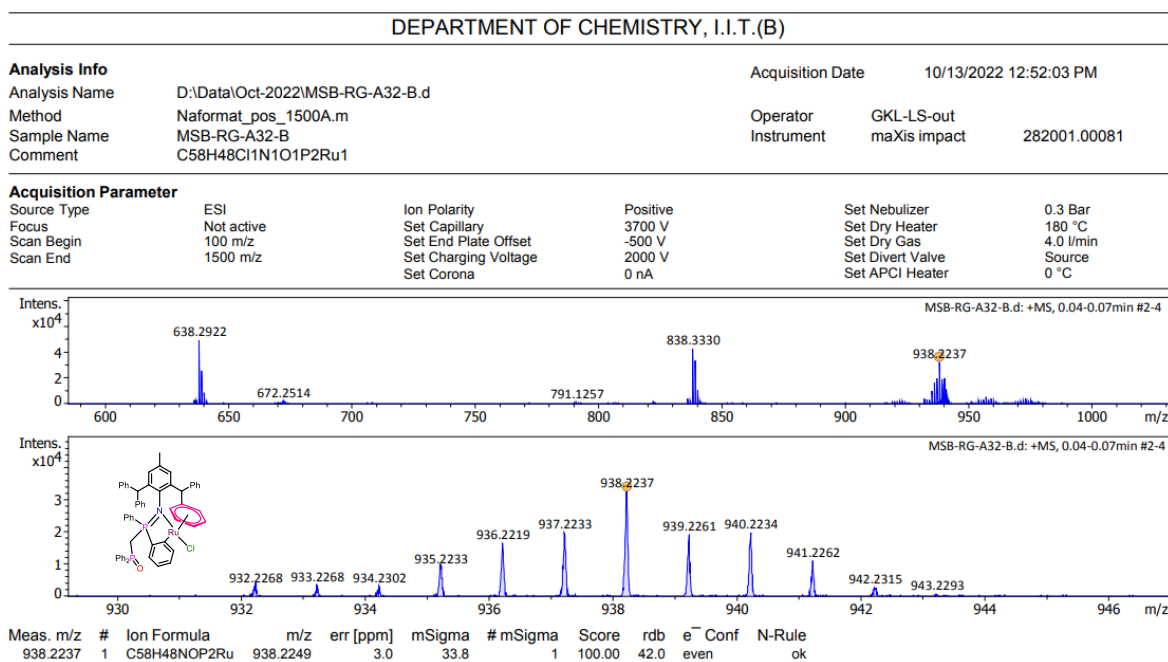

**Figure S19.** HRMS spectrum of **4**.

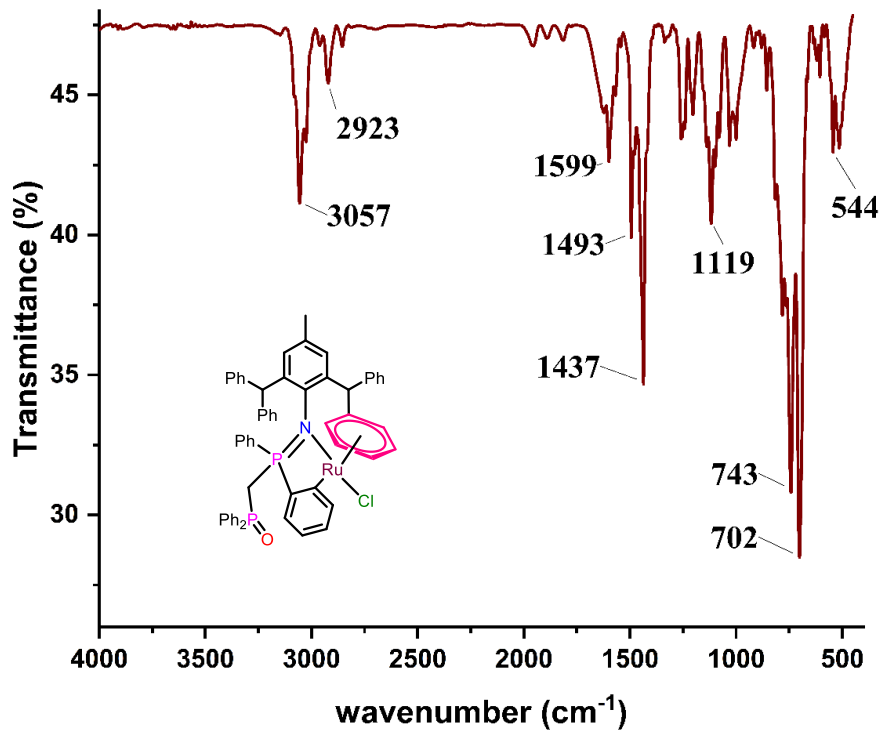

Figure S20. FT-IR spectrum of 4.

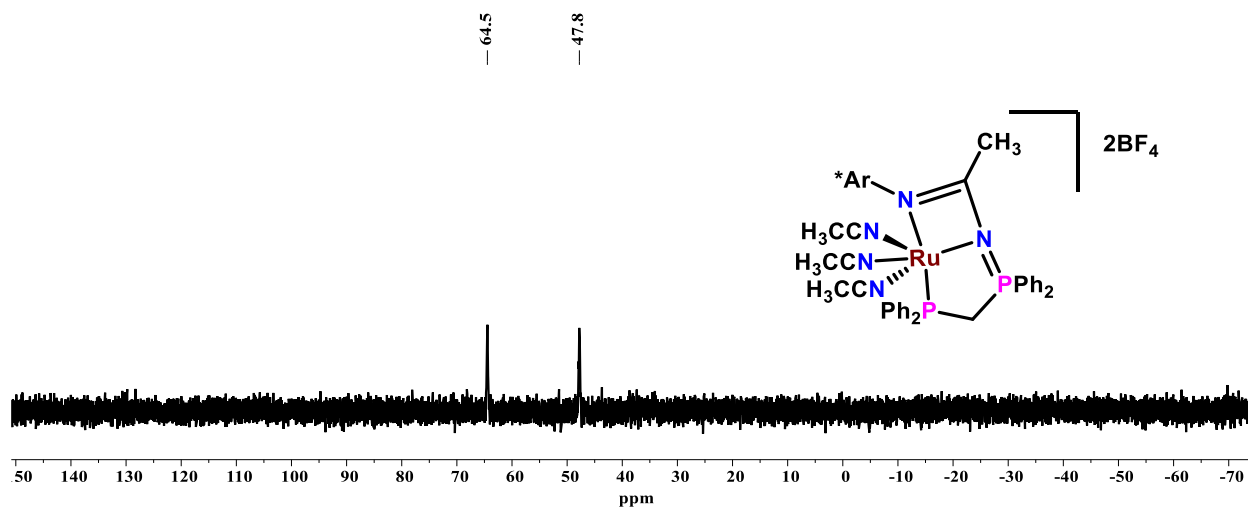

Figure S21.  $^{31}\text{P}\{^1\text{H}\}$  NMR spectrum of 5 in  $\text{CDCl}_3$  (162 MHz).

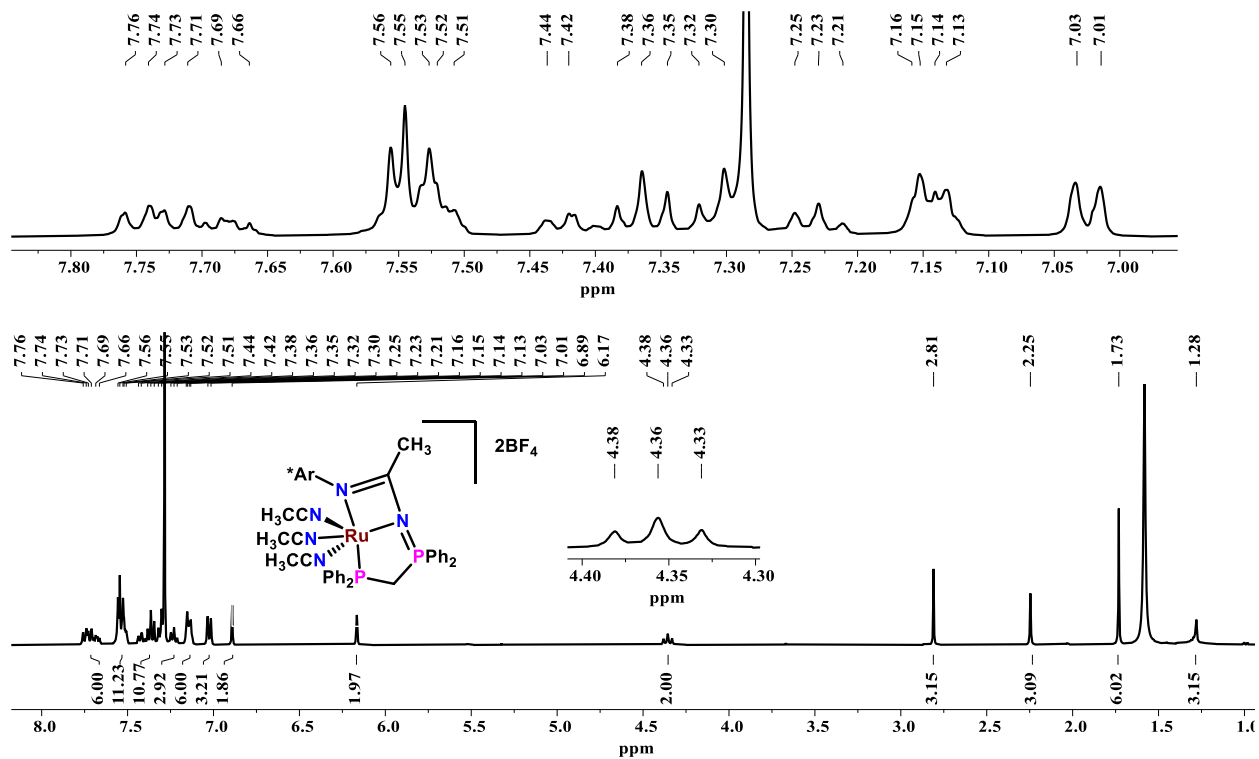

Figure S22.  $^1\text{H}$  NMR spectrum of **5** in  $\text{CDCl}_3$  (400 MHz).

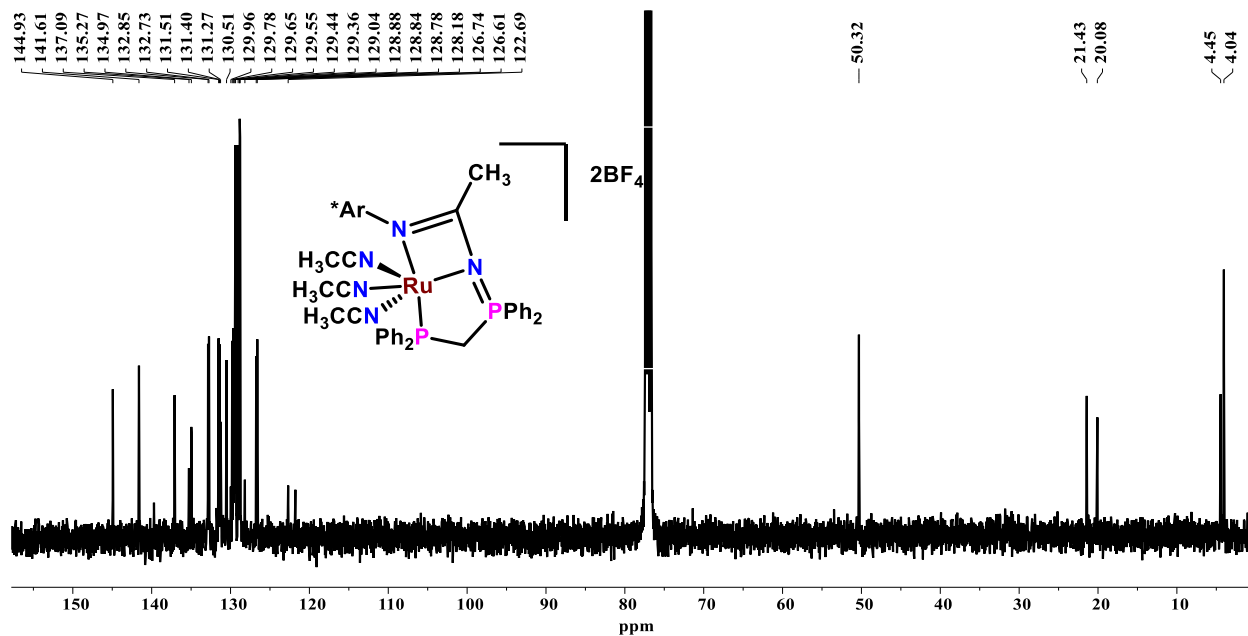

Figure S23.  $^{13}\text{C}$  NMR spectrum of **5** in  $\text{CDCl}_3$  (101 MHz).

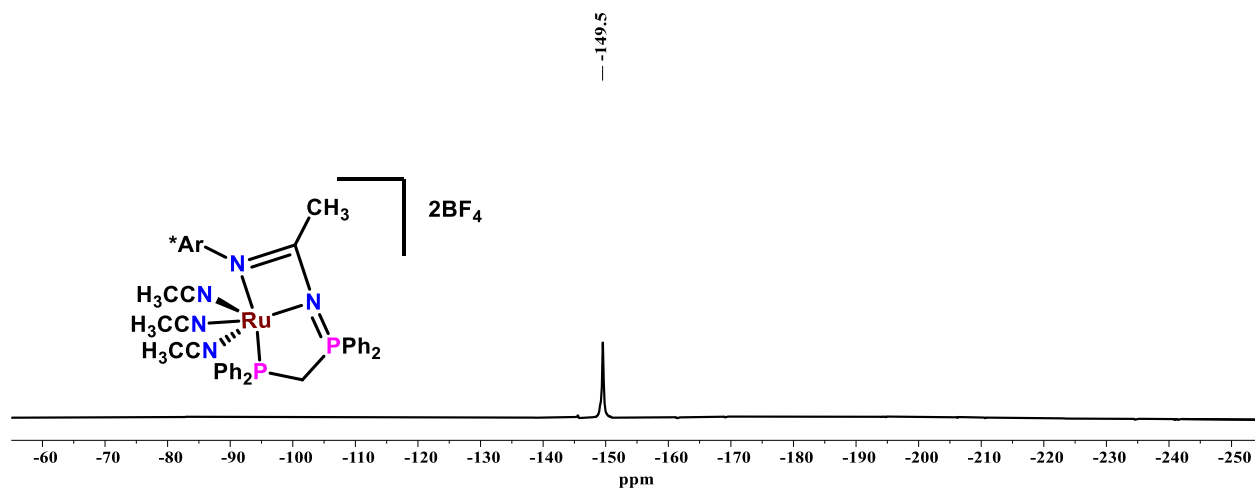

**Figure S24.**  $^{19}\text{F}$  NMR spectrum of **5** in  $\text{CDCl}_3$  (377 MHz).

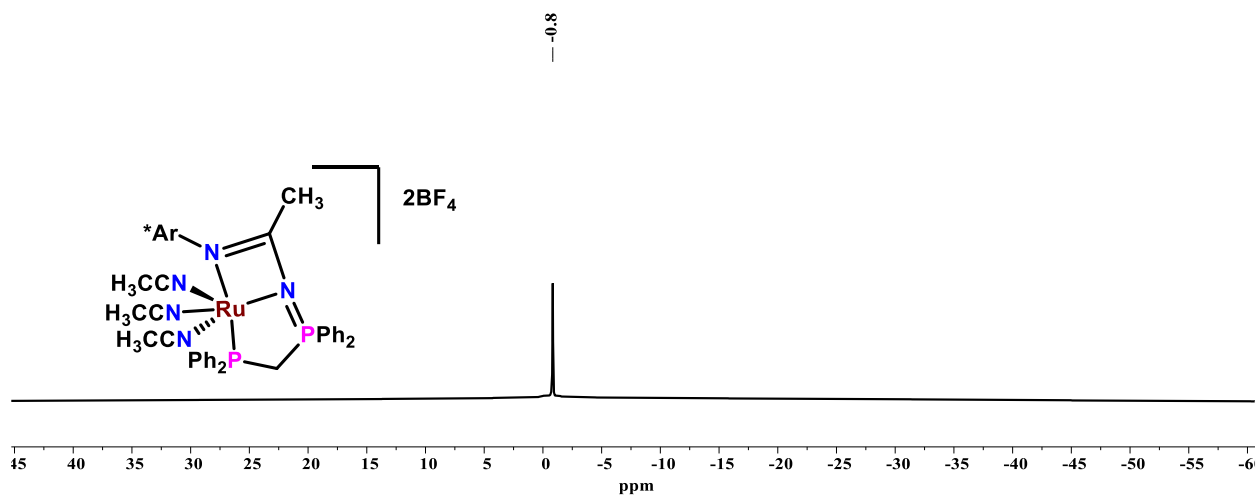

**Figure S25.**  $^{11}\text{B}$  NMR spectrum of **5** in  $\text{CDCl}_3$  (128 MHz).



DEPARTMENT OF CHEMISTRY, I.I.T.(B)

**Analysis Info**

Analysis Name D:\Data\MAY-2023\MSB-RG-A93RuB.d  
 Method NaICsI\_pos\_1500.m  
 Sample Name MSB-RG-A93RuB  
 Comment C66H61N5P2Ru1B1F4

Acquisition Date 5/4/2023 11:00:52 AM

Operator PG-JS-IN  
 Instrument maXis impact 282001.00081

**Acquisition Parameter**

|             |            |                      |          |                  |           |
|-------------|------------|----------------------|----------|------------------|-----------|
| Source Type | ESI        | Ion Polarity         | Positive | Set Nebulizer    | 0.3 Bar   |
| Focus       | Not active | Set Capillary        | 3700 V   | Set Dry Heater   | 180 °C    |
| Scan Begin  | 50 m/z     | Set End Plate Offset | -500 V   | Set Dry Gas      | 4.0 l/min |
| Scan End    | 1500 m/z   | Set Charging Voltage | 2000 V   | Set Divert Valve | Source    |
|             |            | Set Corona           | 0 nA     | Set APCI Heater  | 0 °C      |

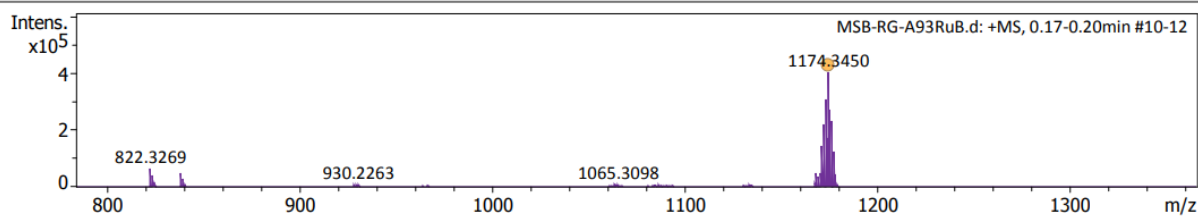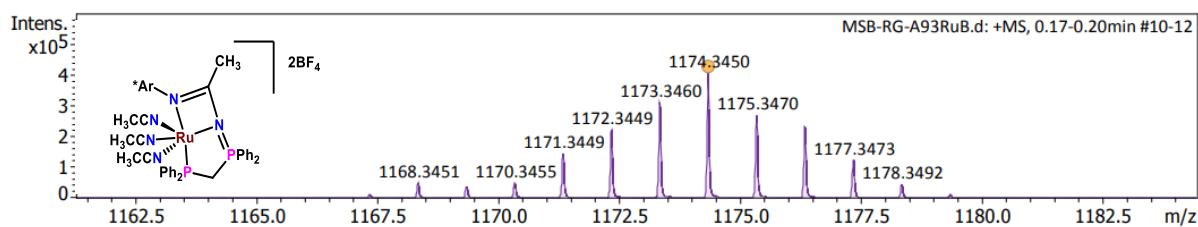

| Meas. m/z | # | Ion Formula     | m/z       | err [ppm] | mSigma | # mSigma | Score  | rdb  | e <sup>-</sup> Conf | N-Rule |
|-----------|---|-----------------|-----------|-----------|--------|----------|--------|------|---------------------|--------|
| 1174.3450 | 1 | C66H61BF4N5P2Ru | 1174.3469 | 3.8       | 8.2    | 1        | 100.00 | 44.0 | even                | ok     |

**Figure S26.** HRMS spectrum of **5**.

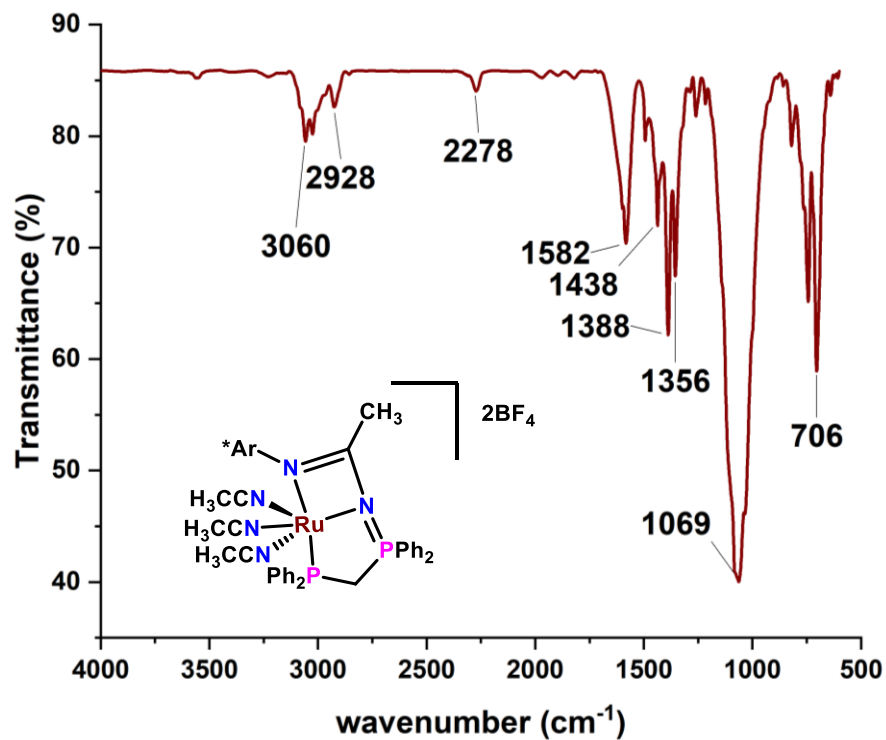

Figure S27. FT-IR spectrum of **5**.

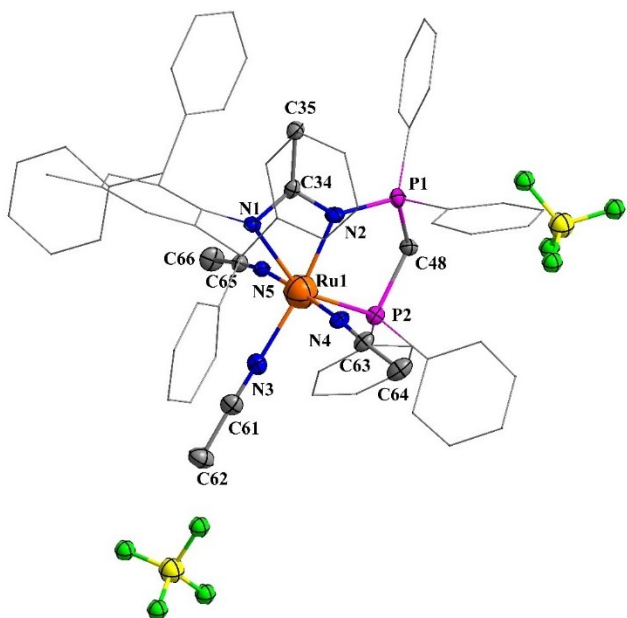

Figure S28. Molecular structure of **5**. Hydrogen atoms have been omitted for clarity. Displacement ellipsoids are drawn at the 30% probability level.

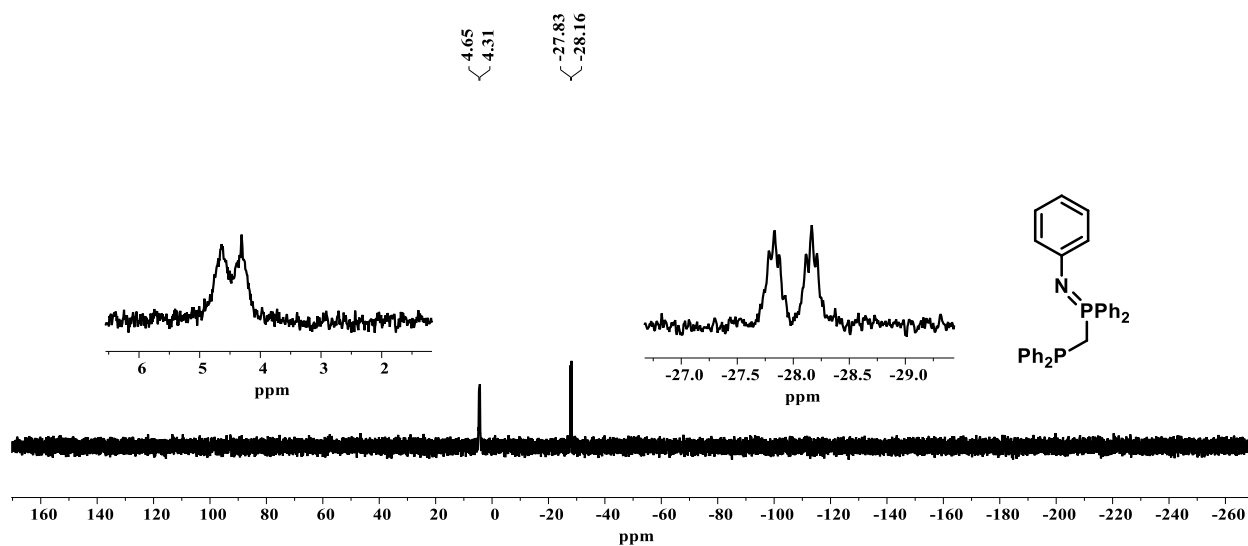

**Figure S29.** <sup>31</sup>P{<sup>1</sup>H} NMR spectrum of **6** in CDCl<sub>3</sub> (162 MHz) .

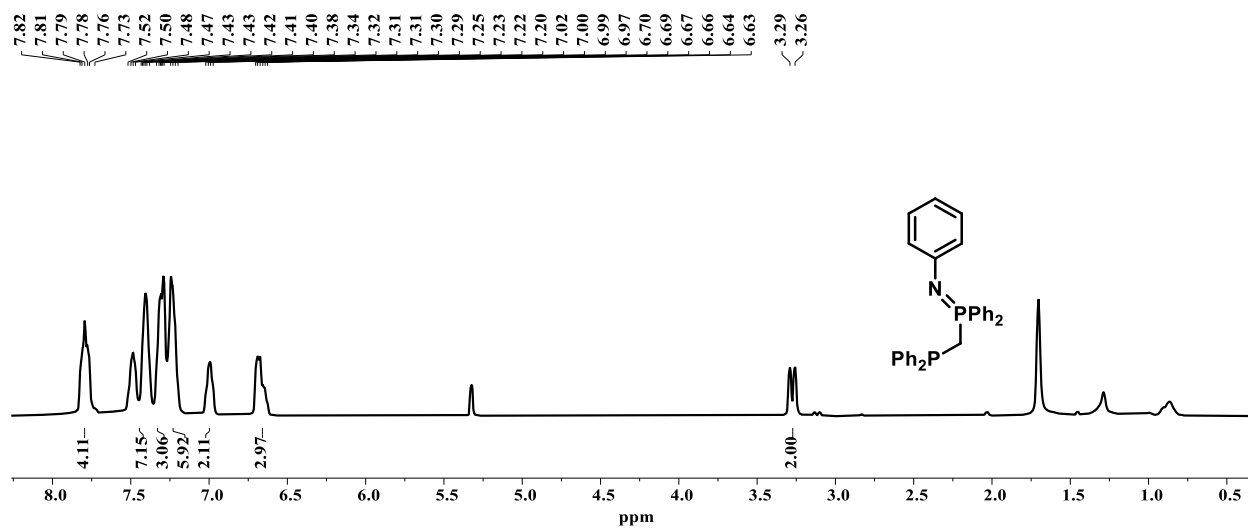

**Figure S30.** <sup>1</sup>H NMR spectrum of **6** in CDCl<sub>3</sub> (400 MHz).

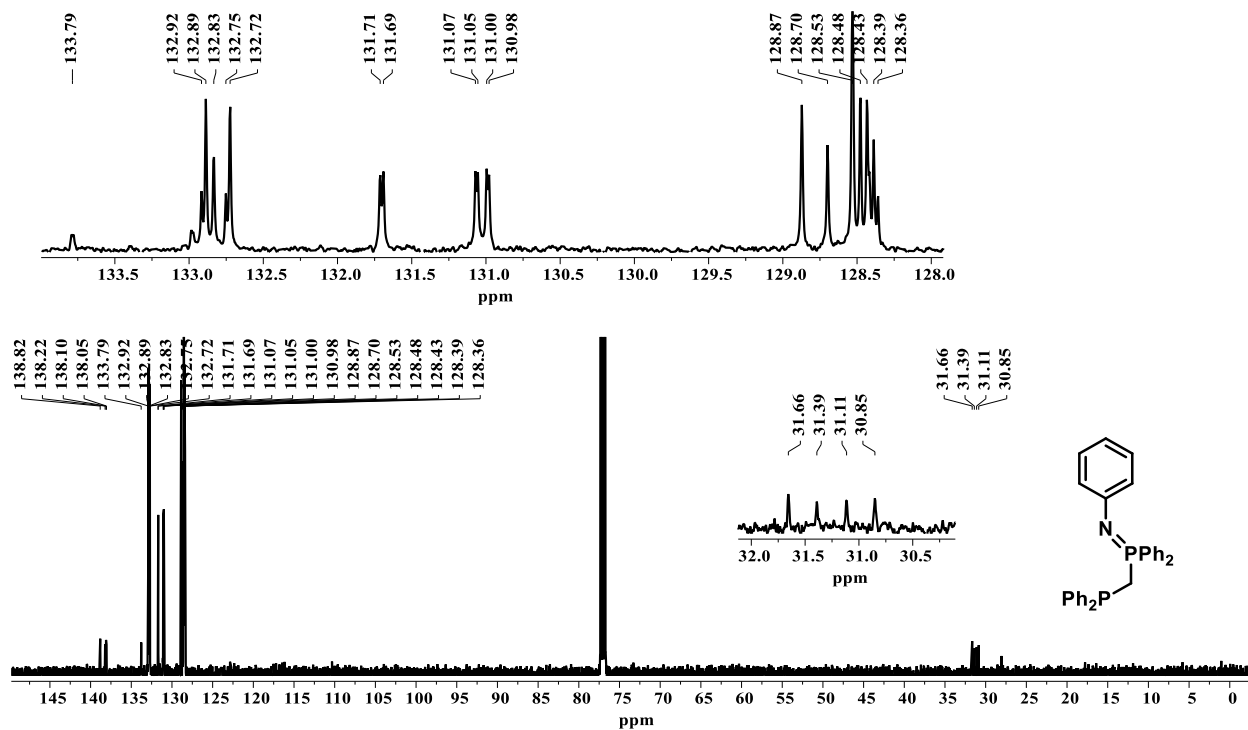

Figure S31. <sup>13</sup>C NMR spectrum of **6** in CDCl<sub>3</sub> (126 MHz).

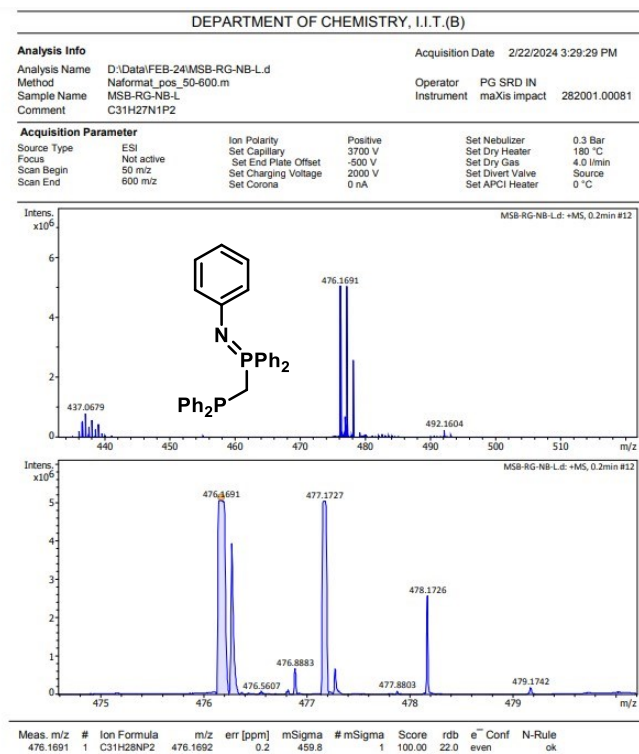

Figure S32. HRMS spectrum of **6**.

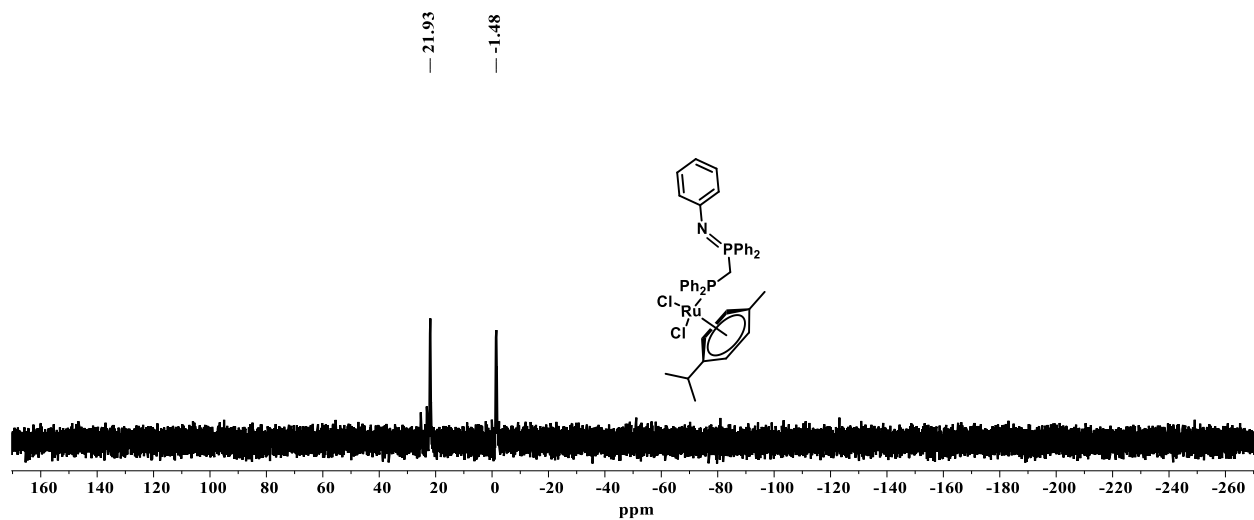

Figure S33.  $^{31}\text{P}\{^1\text{H}\}$  NMR spectrum of 7 in  $\text{CDCl}_3$  (162 MHz).

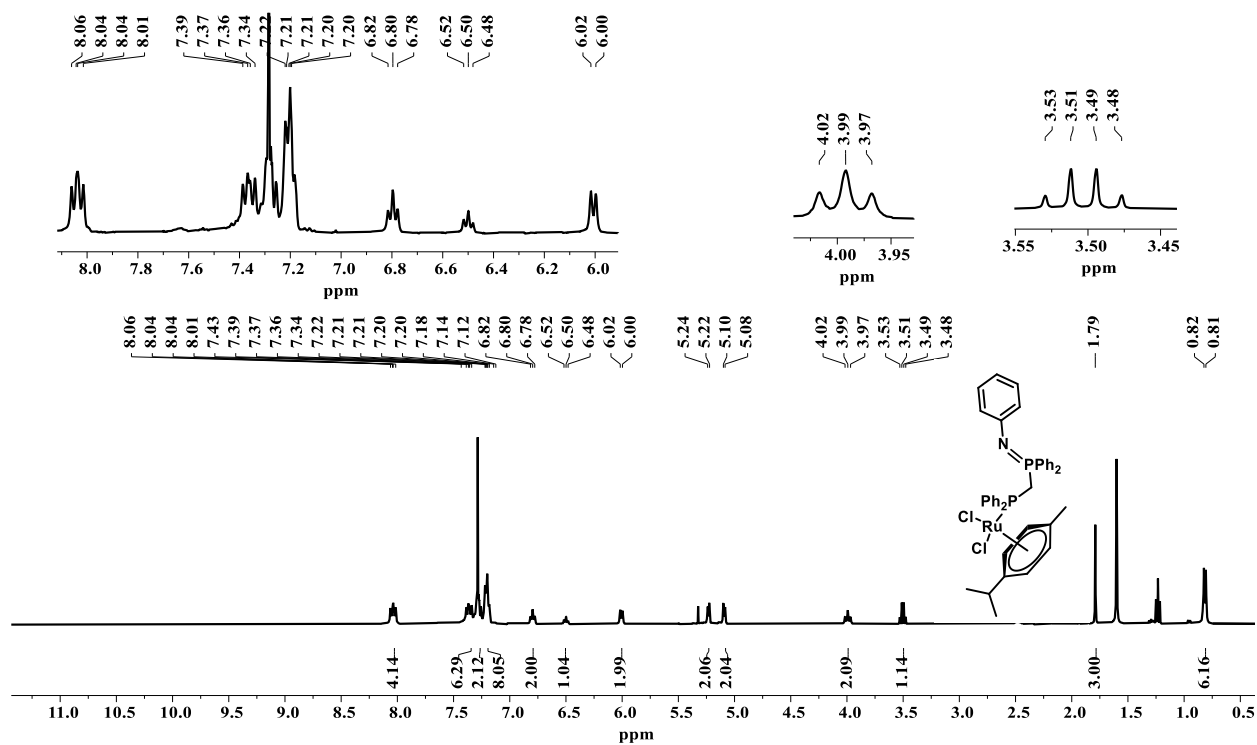

Figure S34.  $^1\text{H}$  NMR spectrum of 7 in  $\text{CDCl}_3$  (400 MHz).

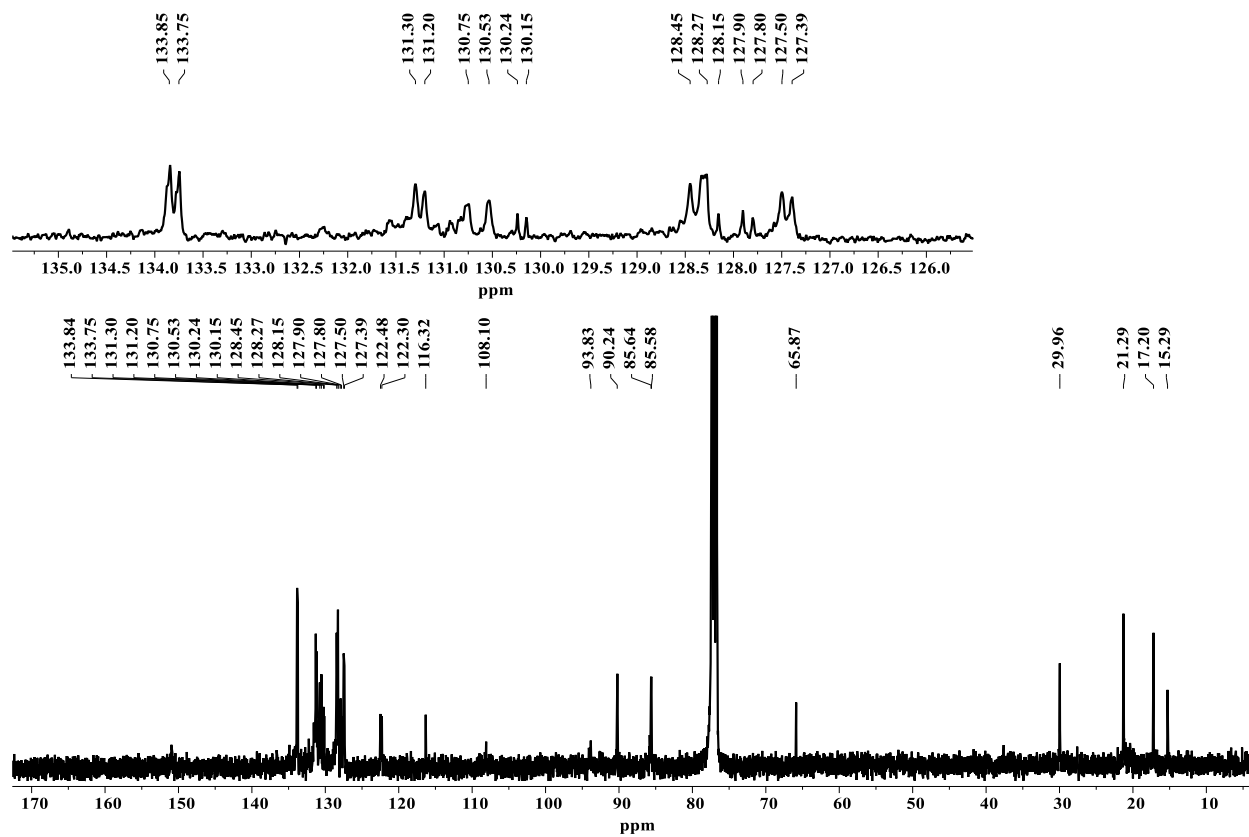

Figure S35.  $^{13}\text{C}$  NMR spectrum of 7 in  $\text{CDCl}_3$  (101 MHz).

DEPARTMENT OF CHEMISTRY, I.I.T.(B)

Analysis Info

Analysis Name D:\Data\FEB-24\MSB-RG-NB-Ru-2.d  
 Method NaICsI\_pos\_2000.m  
 Sample Name MSB-RG-NB-Ru-2  
 Comment C41H41N1P2Ru1Cl2

Acquisition Date 2/27/2024 1:01:44 PM  
 Operator PG ROHAN IN  
 Instrument maXis impact 282001.00081

Acquisition Parameter

|             |            |                      |          |                  |           |
|-------------|------------|----------------------|----------|------------------|-----------|
| Source Type | ESI        | Ion Polarity         | Positive | Set Nebulizer    | 0.3 Bar   |
| Focus       | Not active | Set Capillary        | 3700 V   | Set Dry Heater   | 180 °C    |
| Scan Begin  | 50 m/z     | Set End Plate Offset | -500 V   | Set Dry Gas      | 4.5 l/min |
| Scan End    | 2000 m/z   | Set Charging Voltage | 2000 V   | Set Divert Valve | Source    |
|             |            | Set Corona           | 0 nA     | Set APCI Heater  | 0 °C      |

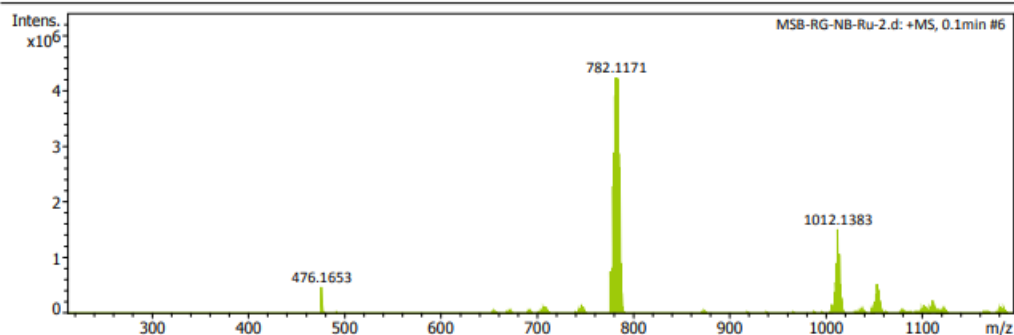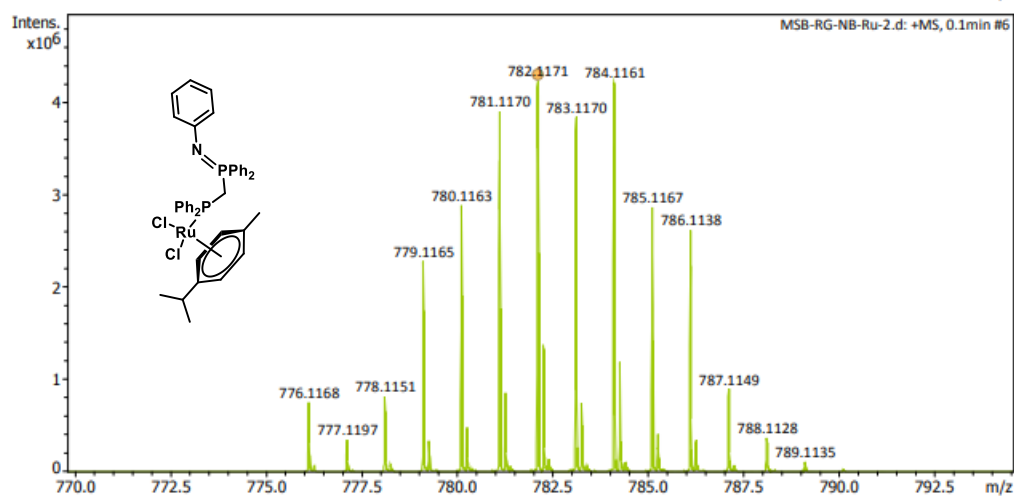

| Meas. m/z | # | Ion Formula    | m/z      | err [ppm] | mSigma | # mSigma | Score  | rdb  | e <sup>-</sup> Conf | N-Rule |
|-----------|---|----------------|----------|-----------|--------|----------|--------|------|---------------------|--------|
| 782.1171  | 1 | C41H42Cl2NP2Ru | 782.1208 | 5.3       | 188.0  | 1        | 100.00 | 33.0 | even                | ok     |

Figure S36. HRMS spectrum of 7.

### Synthesis of $[\text{RuCl}_2\{(\eta^6\text{-}p\text{-cymene})(\text{PPh}_2\text{CH}_2\text{Ph}_2\text{P}=\text{O})\text{-}\kappa^1\text{-P}\}](\mathbf{8})$

The mixture of **1** (0.04 g, 0.04866 mmol) and  $[\text{Ru}(p\text{-cymene})\text{Cl}_2]_2$  (0.014 g, 0.02433 mmol) in chlorobenzene along with few drops of water was stirred at 120 °C for 16 h. The solution was allowed to cool to room temperature, the resulting reaction mixture was evaporated and washed with petroleum ether twice (2 x 15 ml) followed by vacuum evaporation which yielded compound **8**.  $^{31}\text{P}$  NMR (162 MHz,  $\text{CDCl}_3$ )  $\delta$  24.98, 23.05.  $^1\text{H}$  NMR (400 MHz,  $\text{CDCl}_3$ )  $\delta$  8.08 – 7.93 (m, 4H), 7.38 (dd,  $J = 11.8, 8.4$  Hz, 4H), 7.19 (t,  $J = 7.3$  Hz, 4H), 5.26 (d,  $J = 8.0$  Hz, 2H), 5.11 (d,  $J = 6.3$  Hz, 2H), 3.87 (dd,  $J = 10.4, 9.2$  Hz, 2H), 2.49 (p,  $J = 6.9$  Hz, 1H), 1.83 (s, 3H), 0.80 (d,  $J = 7.0$  Hz, 6H).  $^{13}\text{C}$  NMR (101 MHz,  $\text{CDCl}_3$ )  $\delta$  134.93, 133.82 (d,  $J = 9.7$  Hz), 131.58, 131.12, 130.87 (dd,  $J = 10.2, 2.6$  Hz), 130.18 (d,  $J = 9.3$  Hz), 128.20 (d,  $J = 12.0$  Hz), 127.83 (d,  $J = 10.3$  Hz), 108.27, 94.04, 90.17 (d,  $J = 4.4$  Hz), 85.78 (d,  $J = 6.1$  Hz), 30.01, 21.25, 17.28.

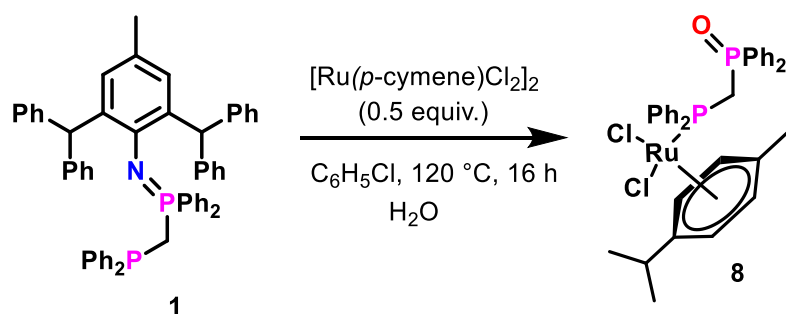

Scheme S1. Synthesis of complex **8**.

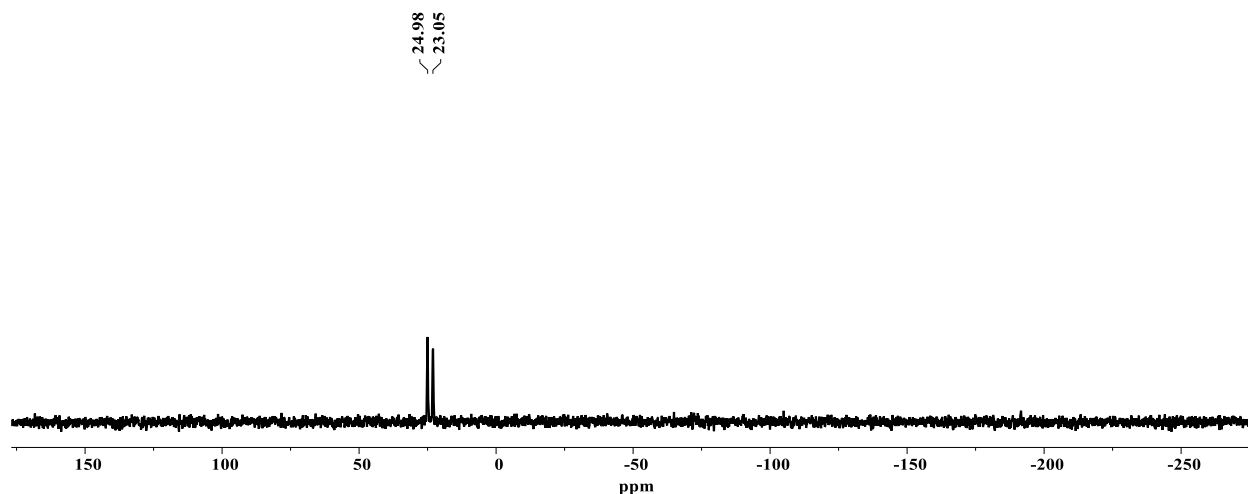

Figure S37.  $^{31}\text{P}\{^1\text{H}\}$  NMR spectrum of **8** in  $\text{CDCl}_3$  (162 MHz).



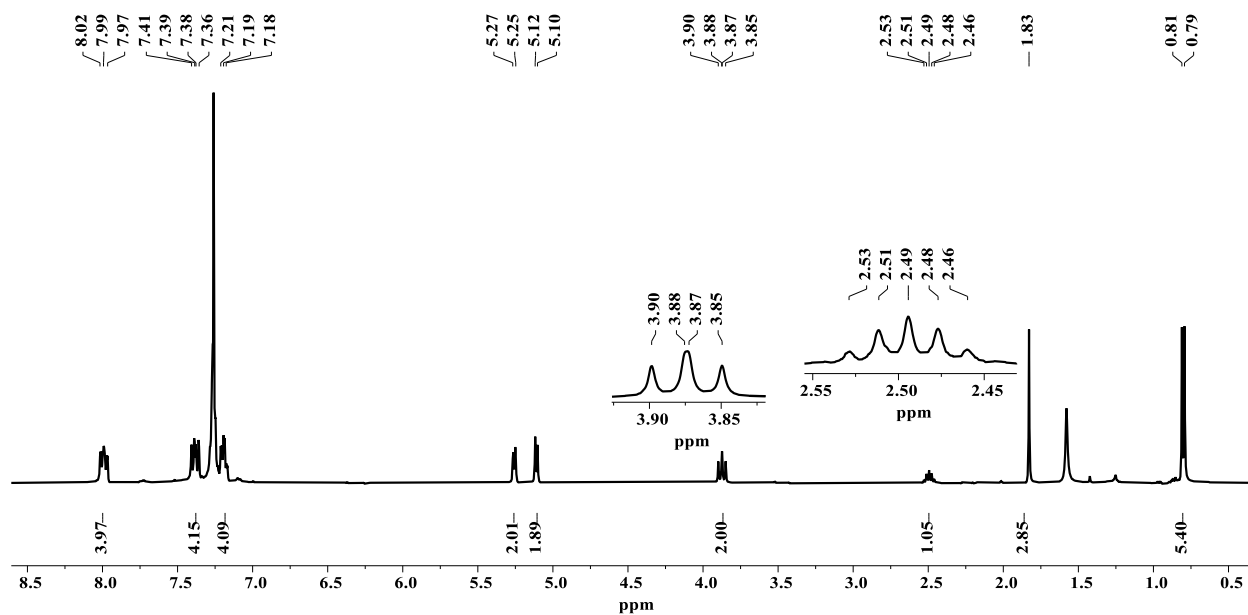

Figure S38.  $^1\text{H}$  NMR spectrum of **8** in  $\text{CDCl}_3$  (400 MHz).

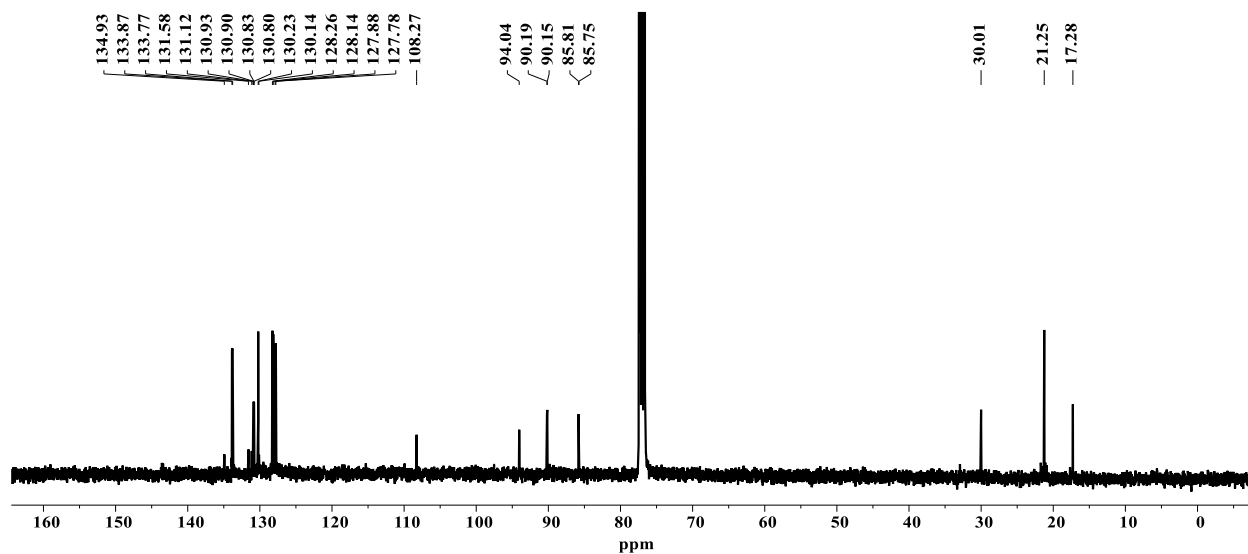

Figure S39.  $^{13}\text{C}$  NMR spectrum of **8** in  $\text{CDCl}_3$  (101 MHz).

## Synthesis of complex 3 from 2

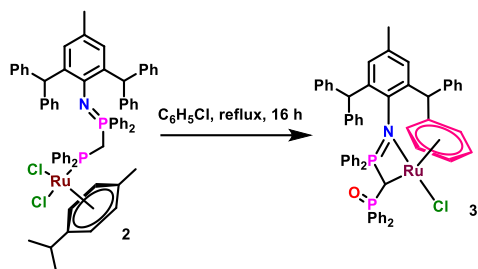

Scheme S2. Formation of complex 3 from 2.

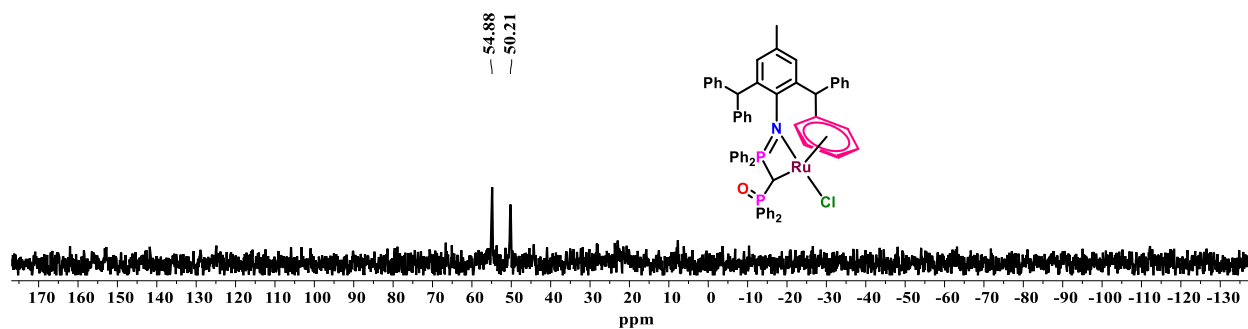

Figure S40.  $^{31}\text{P}\{^1\text{H}\}$  NMR spectrum of 3 in  $\text{CDCl}_3$  (162 MHz).

## Formation of C-H activated Ru<sup>II</sup> complex 3

The reaction of compound 1 (0.0121 mmol) with  $[\text{Ru}(p\text{-cymene})\text{Cl}_2]_2$  (0.00609 mmol) in chlorobenzene was carried out in a J Youngs NMR tube. The progression of the reaction was monitored using  $^{31}\text{P}$  NMR spectroscopy and mass spectrometry.

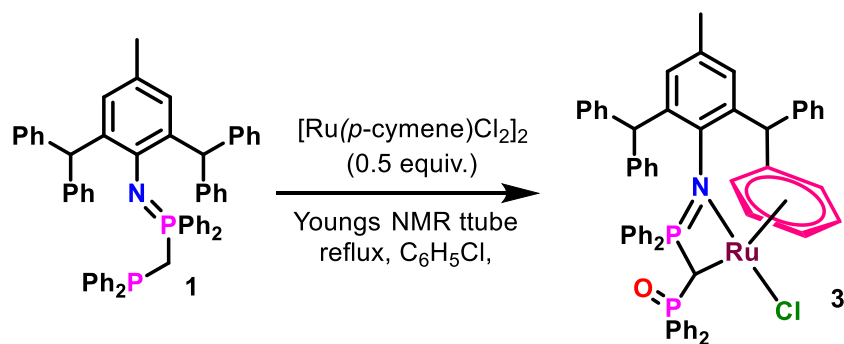

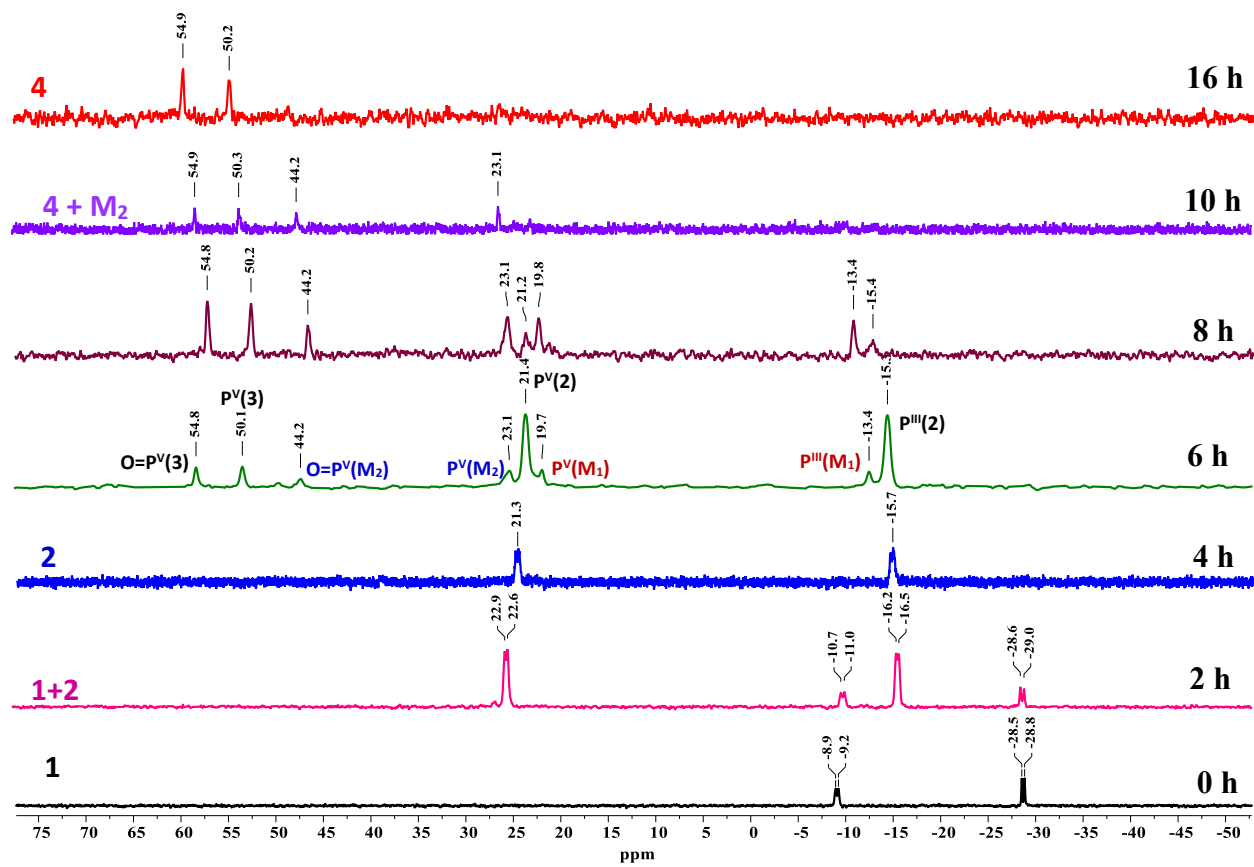

Figure S41.  $^{31}\text{P}$  variable time NMR spectra for the formation of **3** in  $\text{C}_6\text{H}_5\text{Cl}$ .

## DEPARTMENT OF CHEMISTRY, I.I.T.(B)

**Analysis Info**  
 Analysis Name D:\Data\JULY-2022\MSB-RG-A-12.d Acquisition Date 7/19/2022 7:28:29 PM  
 Method NaFormat\_pos\_1500.m Operator MSB-IN  
 Sample Name MSB-RG-A-12 Instrument maXis impact 282001.00081  
 Comment C58H48NP2O1Ru1Cl1

**Acquisition Parameter**  
 Source Type ESI Ion Polarity Positive Set Nebulizer 0.3 Bar  
 Set Capillary 3700 V Set Dry Heater 180 °C  
 Focus Not active Set End Plate Offset -500 V Set Dry Gas 4.0 l/min  
 Scan Begin 100 m/z Set Charging Voltage 2000 V Set Divert Valve Source  
 Scan End 1500 m/z Set Corona 0 nA Set AP/CI Heater 0 °C

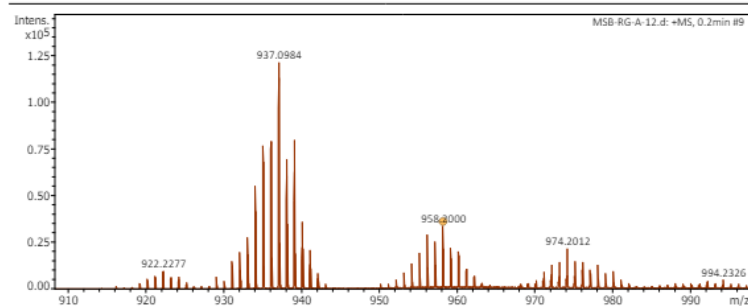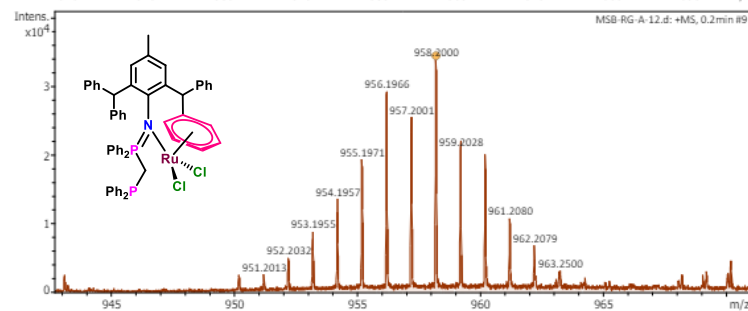

| Meas. m/z | # | Ion Formula     | m/z      | err [ppm] | mSigma | # mSigma | Score  | rdb  | e <sup>-</sup> Conf | N-Rule |
|-----------|---|-----------------|----------|-----------|--------|----------|--------|------|---------------------|--------|
| 958.2000  | 1 | C54H49ClNO3P2Ru | 958.1914 | -7.7      | 188.9  | 1        | 100.00 | 40.0 | even                | ok     |

**Figure S42.** HRMS spectrum of **M<sub>1</sub>**. (HRMS (ESI) of C<sub>58</sub>H<sub>49</sub>Cl<sub>2</sub>NP<sub>2</sub>Ru calc for [M-Cl]<sup>+</sup> : 958.1914, Found: 958.2000.)

## DEPARTMENT OF CHEMISTRY, I.I.T.(B)

**Analysis Info** Acquisition Date 7/19/2022 7:28:29 PM  
 Analysis Name D:\Data\JULY-2022\MSB-RG-A-12.d  
 Method Naformat\_pos\_1500.m Operator MSB-IN  
 Sample Name MSB-RG-A-12 Instrument maXis impact 282001.00081  
 Comment C58H48NP2O1Ru1Cl1

**Acquisition Parameter**

| Source Type | ESI        | Ion Polarity         | Positive | Set Nebulizer    | 0.3 Bar   |
|-------------|------------|----------------------|----------|------------------|-----------|
| Focus       | Not active | Set Capillary        | 3700 V   | Set Dry Heater   | 180 °C    |
| Scan Begin  | 100 m/z    | Set End Plate Offset | -500 V   | Set Dry Gas      | 4.0 l/min |
| Scan End    | 1500 m/z   | Set Charging Voltage | 2000 V   | Set Divert Valve | Source    |
|             |            | Set Corona           | 0 nA     | Set APCI Heater  | 0 °C      |

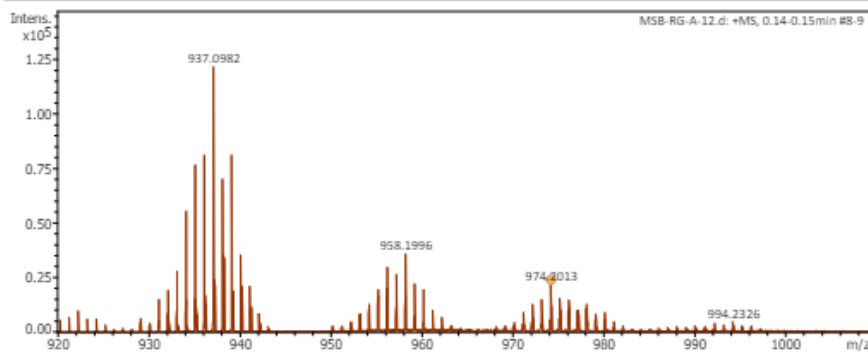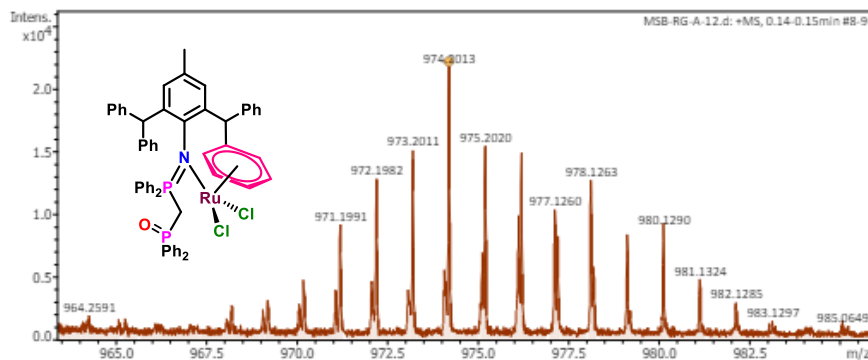

| Meas. m/z | # | Ion Formula                                                          | m/z      | err [ppm] | mSigma | # mSigma | Score  | rdb  | e <sup>-</sup> Conf | N-Rule |
|-----------|---|----------------------------------------------------------------------|----------|-----------|--------|----------|--------|------|---------------------|--------|
| 974.2013  | 1 | C <sub>58</sub> H <sub>49</sub> Cl <sub>2</sub> INOP <sub>2</sub> Ru | 974.2016 | 1.6       | 78.0   | 1        | 100.00 | 44.0 | even                | ok     |

MSB-RG-A-12.d

Bruker Compass DataAnalysis 5.1

printed: 5/6/2024 4:03:35 PM

by: iitb

Page 1 of 1

**Figure S43.** HRMS spectrum of **M<sub>2</sub>**. (HRMS (ESI) of C<sub>58</sub>H<sub>49</sub>Cl<sub>2</sub>NOP<sub>2</sub>Ru calc for [M-Cl]<sup>+</sup> : 974.2016, Found: 974.2013.)

## DEPARTMENT OF CHEMISTRY, I.I.T.(B)

**Analysis Info**  
Analysis Name D:\Data\OCT-2023\MSB-RG-RU-I-1.d Acquisition Date 10/5/2023 12:08:44 PM  
Method NaICsl\_pos\_2000.m Operator SJG-OUT  
Sample Name MSB-RG-RU-I-1 Instrument maXis impact 282001.00081  
Comment HRMS

**Acquisition Parameter**

|             |            |                      |          |                  |           |
|-------------|------------|----------------------|----------|------------------|-----------|
| Source Type | ESI        | Ion Polarity         | Positive | Set Nebulizer    | 0.3 Bar   |
| Focus       | Not active | Set Capillary        | 3700 V   | Set Dry Heater   | 180 °C    |
| Scan Begin  | 50 m/z     | Set End Plate Offset | -500 V   | Set Dry Gas      | 4.5 l/min |
| Scan End    | 2000 m/z   | Set Charging Voltage | 2000 V   | Set Divert Valve | Source    |
|             |            | Set Corona           | 0 nA     | Set APCI Heater  | 0 °C      |

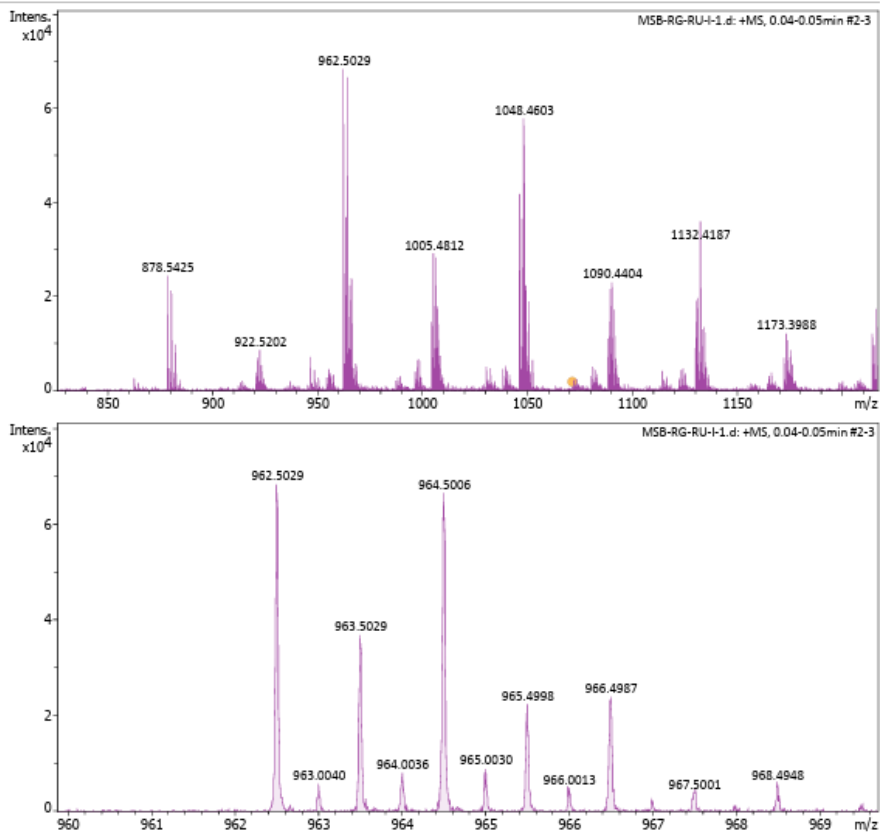

**Figure S44.** LRMS spectrum of intermediate **B** of transfer hydrogenation reaction.

## NMR spectral data of catalytic products

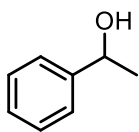

1-phenylethan-1-ol (**a1**). The compound was isolated as a colorless liquid. Yield: 97%.  $^1\text{H}$  NMR (500 MHz,  $\text{CDCl}_3$ )  $\delta$  7.68 – 6.84 (m, 1H), 4.86 (q,  $J$  = 6.5 Hz, 1H), 3.19 – 2.97 (d,  $J$  = 5.7 Hz, 1H), 1.51 (d,  $J$  = 6.7 Hz, 3H).  $^{13}\text{C}$  NMR (126 MHz,  $\text{CDCl}_3$ )  $\delta$  145.99, 128.48, 127.39, 125.52, 70.23, 25.20.

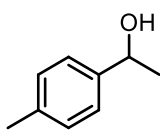

1-(p-tolyl)ethan-1-ol (**a2**). The compound was isolated as a colorless liquid. Yield: 95%.  $^1\text{H}$  NMR (400 MHz,  $\text{CDCl}_3$ )  $\delta$  7.34 – 7.16 (m, 4H), 4.90 – 4.80 (m, 1H), 3.20 – 3.13 (m, 1H), 2.43 (s, 3H), 1.50 (s, 3H).  $^{13}\text{C}$  NMR (101 MHz,  $\text{CDCl}_3$ )  $\delta$  143.10, 136.96, 129.15, 125.51, 70.07, 25.17, 21.17.

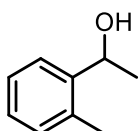

1-(o-tolyl)ethan-1-ol (**a3**). The compound was isolated as a colorless liquid. Yield: 94%.  $^1\text{H}$  NMR (400 MHz,  $\text{CDCl}_3$ )  $\delta$  7.51 (dd,  $J$  = 7.7, 1.5 Hz, 1H), 7.27 – 7.09 (m, 3H), 5.12 (q,  $J$  = 6.4 Hz, 1H), 2.35 (s, 3H), 2.01 (s, 1H), 1.46 (d,  $J$  = 6.4 Hz, 3H).  $^{13}\text{C}$  NMR (101 MHz,  $\text{CDCl}_3$ )  $\delta$  143.87, 130.38, 127.18, 126.39, 124.50, 66.80, 23.94, 18.93.

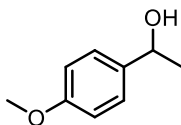

1-(4-methoxyphenyl)ethan-1-ol (**a4**). The compound was isolated as a colorless liquid. Yield: 89%.  $^1\text{H}$  NMR (500 MHz,  $\text{CDCl}_3$ )  $\delta$  7.28 (d,  $J$  = 8.7 Hz, 2H), 6.88 (d,  $J$  = 8.7 Hz, 2H), 4.82 (t,  $J$  = 6.5 Hz, 1H), 3.80 (s, 3H), 2.72 (s, 1H), 1.46 (d,  $J$  = 6.5 Hz, 3H).  $^{13}\text{C}$  NMR (126 MHz,  $\text{CDCl}_3$ )  $\delta$  158.85, 138.16, 126.71, 113.80, 69.79, 55.27, 25.05.

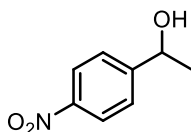

1-(4-nitrophenyl)ethan-1-ol (**a5**). The compound was isolated as a colorless liquid. Yield: 93%.  $^1\text{H}$  NMR (500 MHz,  $\text{CDCl}_3$ )  $\delta$  8.13 (d,  $J$  = 8.4 Hz, 1H), 7.51 (d,  $J$  = 8.4 Hz, 1H), 4.99 (q,  $J$  = 6.7 Hz, 1H), 2.97 (s, 1H), 1.48 (d,  $J$  = 6.6 Hz, 2H).  $^{13}\text{C}$  NMR (126 MHz,  $\text{CDCl}_3$ )  $\delta$  153.37, 146.98, 126.16, 123.67, 69.37, 25.38.

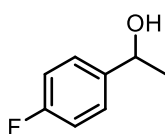

1-(4-fluorophenyl)ethan-1-ol (**a6**). The compound was isolated as a colorless liquid. Yield: 92%.  $^1\text{H}$  NMR (400 MHz,  $\text{CDCl}_3$ )  $\delta$  7.31 (ddd,  $J$  = 8.9, 5.4, 0.6 Hz, 2H), 7.02 (t,  $J$  = 8.8 Hz, 2H), 4.84 (qd,  $J$  = 6.3, 2.3 Hz, 1H), 2.68 (d,  $J$  = 3.1 Hz, 1H), 1.45 (d,  $J$  = 6.5 Hz, 3H).  $^{13}\text{C}$  NMR (101 MHz,  $\text{CDCl}_3$ )  $\delta$

163.29, 160.86, 141.57, 141.54, 127.11, 127.02, 115.30, 115.09, 69.65, 25.22.

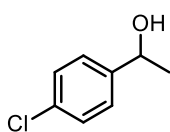

1-(4-chlorophenyl)ethan-1-ol (**a7**). The compound was isolated as a yellowish liquid. Yield: 90%.  $^1\text{H}$  NMR (400 MHz,  $\text{CDCl}_3$ )  $\delta$  7.27 (d,  $J = 10.7$  Hz, 4H), 4.79 (q,  $J = 4.7$  Hz, 1H), 3.03 – 2.98 (m, 1H), 1.42 (d,  $J = 6.5$  Hz, 3H).  $^{13}\text{C}$  NMR (101 MHz,  $\text{CDCl}_3$ )  $\delta$  144.29, 132.95, 128.54, 126.84, 69.57, 25.20.

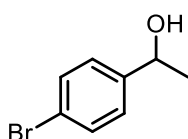

1-(4-bromophenyl)ethan-1-ol (**a8**). The compound was isolated as a yellow liquid. Yield: 89%.  $^1\text{H}$  NMR (400 MHz,  $\text{CDCl}_3$ )  $\delta$  7.49 – 7.41 (m, 2H), 7.28 – 7.18 (m, 2H), 4.83 (d,  $J = 6.4$  Hz, 1H), 2.22 (s, 1H), 1.45 (d,  $J = 6.5$  Hz, 3H).  $^{13}\text{C}$  NMR (101 MHz,  $\text{CDCl}_3$ )  $\delta$  144.77, 131.55, 127.18, 121.15, 69.75, 25.24.

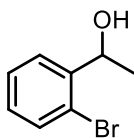

1-(2-bromophenyl)ethan-1-ol (**a9**). The compound was isolated as a white solid. Yield: 87%.  $^1\text{H}$  NMR (400 MHz,  $\text{CDCl}_3$ )  $\delta$  7.50 (d,  $J = 2.0$  Hz, 1H), 7.37 (dt,  $J = 7.8, 1.6$  Hz, 1H), 7.24 (d,  $J = 7.7$  Hz, 2H), 4.79 (d,  $J = 6.5$  Hz, 1H), 2.64 (s, 1H), 1.43 (d,  $J = 6.5$  Hz, 3H).  $^{13}\text{C}$  NMR (101 MHz,  $\text{CDCl}_3$ )  $\delta$  148.14, 130.43, 130.11, 128.57, 124.06, 122.58, 69.66, 25.22.

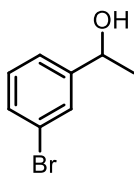

1-(3-bromophenyl)ethan-1-ol (**a10**). The compound was isolated as a yellowish liquid. Yield: 88%.  $^1\text{H}$  NMR (400 MHz,  $\text{CDCl}_3$ )  $\delta$  7.59 – 7.45 (m, 2H), 7.31 (td,  $J = 7.6, 1.3$  Hz, 1H), 7.10 (td,  $J = 7.7, 1.8$  Hz, 1H), 5.20 (q,  $J = 6.4$  Hz, 1H), 2.73 (d,  $J = 12.2$  Hz, 1H), 1.44 (d,  $J = 6.4$  Hz, 3H).  $^{13}\text{C}$  NMR (101 MHz,  $\text{CDCl}_3$ )  $\delta$  144.68, 132.63, 128.74, 127.87, 126.71, 121.67, 69.13, 23.61.

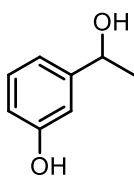

1-(1-hydroxyethyl)phenol (**a11**). The compound was isolated as a colorless liquid. Yield: 91%.  $^1\text{H}$  NMR (400 MHz, DMSO)  $\delta$  9.24 (s, 1H), 7.05 (t,  $J = 7.8$  Hz, 1H), 6.76 – 6.67 (m, 2H), 6.60 – 6.53 (m, 1H), 5.05 (d,  $J = 4.2$  Hz, 1H), 4.59 (dd,  $J = 6.5, 4.2$  Hz, 1H), 1.25 (d,  $J = 6.5$  Hz, 3H).  $^{13}\text{C}$  NMR (101 MHz, DMSO)  $\delta$  157.59, 149.46, 129.35, 116.41, 113.81, 112.61, 68.47, 26.40.



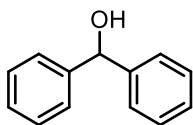

Diphenylmethanol (**a12**). The compound was isolated as a white solid. Yield: 88%.  $^1\text{H}$  NMR (500 MHz,  $\text{CDCl}_3$ )  $\delta$  7.61 – 6.95 (m, 10H), 5.88 (d,  $J$  = 3.3 Hz, 1H), 2.34 (d,  $J$  = 3.6 Hz, 1H).  $^{13}\text{C}$  NMR (126 MHz,  $\text{CDCl}_3$ )  $\delta$  143.83, 128.53, 127.60, 126.57, 76.28.

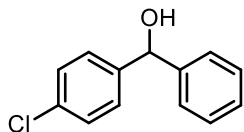

(4-chlorophenyl)(phenyl)methanol (**a13**). The compound was isolated as a colorless liquid. Yield: 86%.  $^1\text{H}$  NMR (500 MHz,  $\text{CDCl}_3$ )  $\delta$  7.46 – 7.24 (m, 9H), 5.77 (s, 1H), 2.80 (d,  $J$  = 12.2 Hz, 1H).  $^{13}\text{C}$  NMR (126 MHz,  $\text{CDCl}_3$ )  $\delta$  143.46, 142.27, 133.26, 131.56, 130.03, 128.70, 128.67, 128.62, 128.48, 127.95, 127.87, 126.58, 75.57.

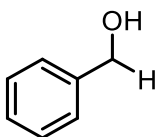

Phenylmethanol (**a14**). The compound was isolated as a colorless liquid. Yield: 89%.  $^1\text{H}$  NMR (400 MHz,  $\text{CDCl}_3$ )  $\delta$  7.37 (s, 5H), 4.64 (s, 2H), 2.94 (s, 1H).  $^{13}\text{C}$  NMR (101 MHz,  $\text{CDCl}_3$ )  $\delta$  140.92, 128.55, 127.60, 127.06, 65.08, 65.05.

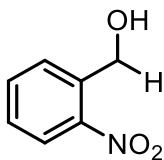

(2-nitrophenyl)methanol (**a15**). The compound was isolated as a white solid. Yield: 90%.  $^1\text{H}$  NMR (400 MHz,  $\text{CDCl}_3$ )  $\delta$  8.10 (dd,  $J$  = 8.2, 1.3 Hz, 1H), 7.78 – 7.63 (m, 2H), 7.48 (ddd,  $J$  = 8.7, 7.4, 1.6 Hz, 1H), 4.98 (s, 2H), 2.59 (s, 1H).  $^{13}\text{C}$  NMR (101 MHz,  $\text{CDCl}_3$ )  $\delta$  136.78, 134.17, 130.02, 128.54, 125.05, 62.58.

## NMR spectra of substrates

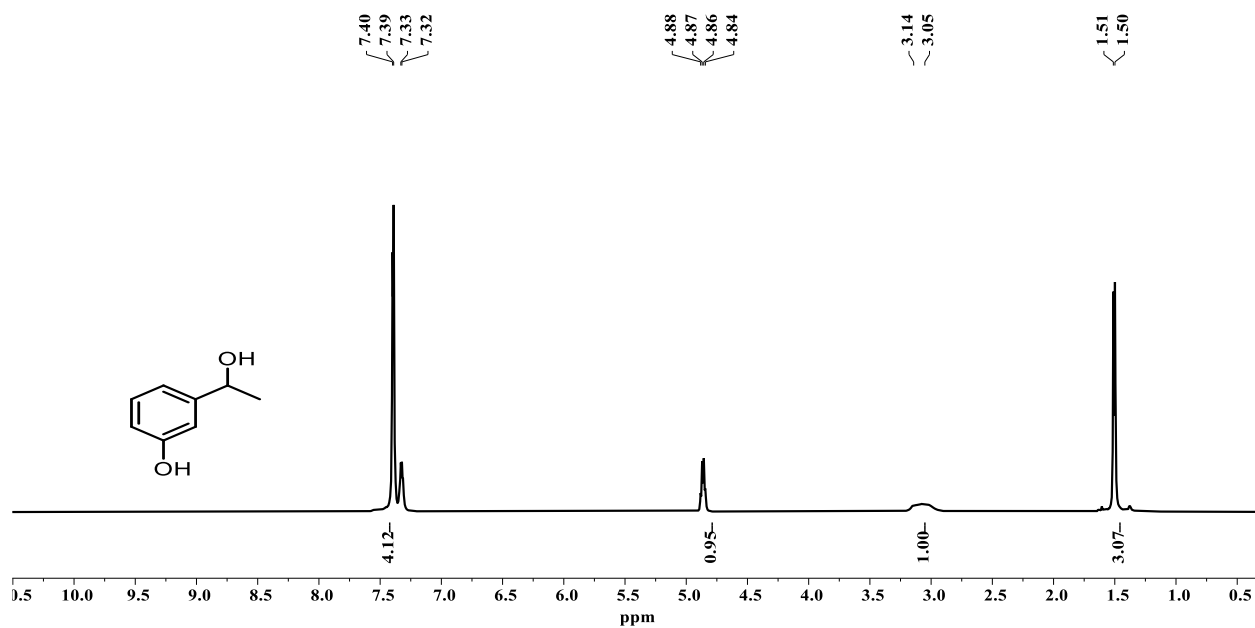

Figure S45.  $^1\text{H}$  NMR spectrum of **a1** in  $\text{CDCl}_3$  (500 MHz).

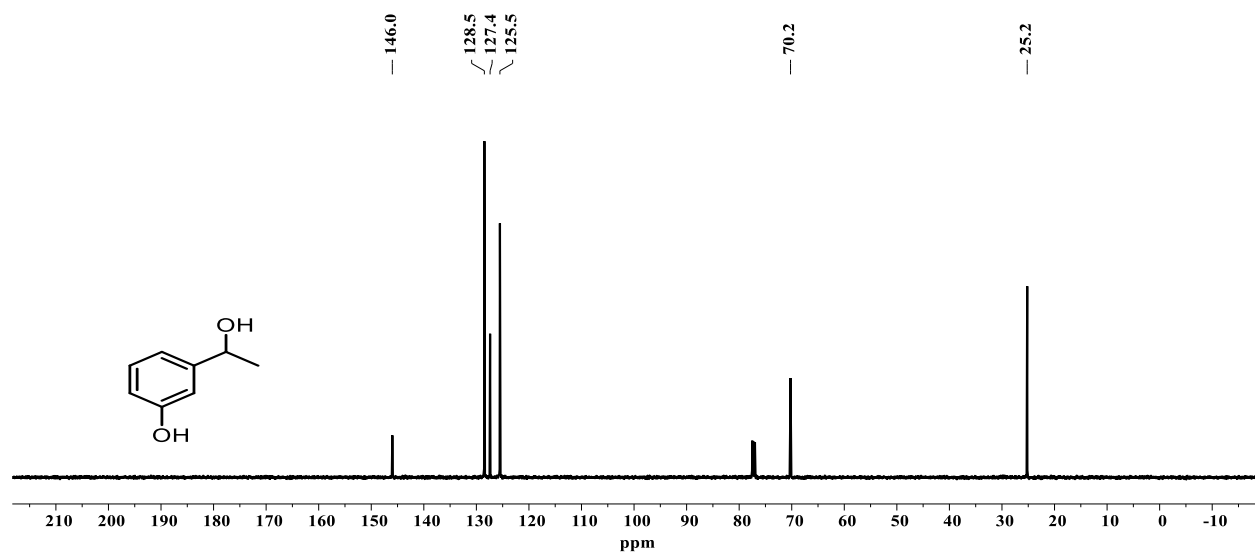

Figure S46.  $^{13}\text{C}\{^1\text{H}\}$  NMR spectrum of **a1** in  $\text{CDCl}_3$  (126 MHz).

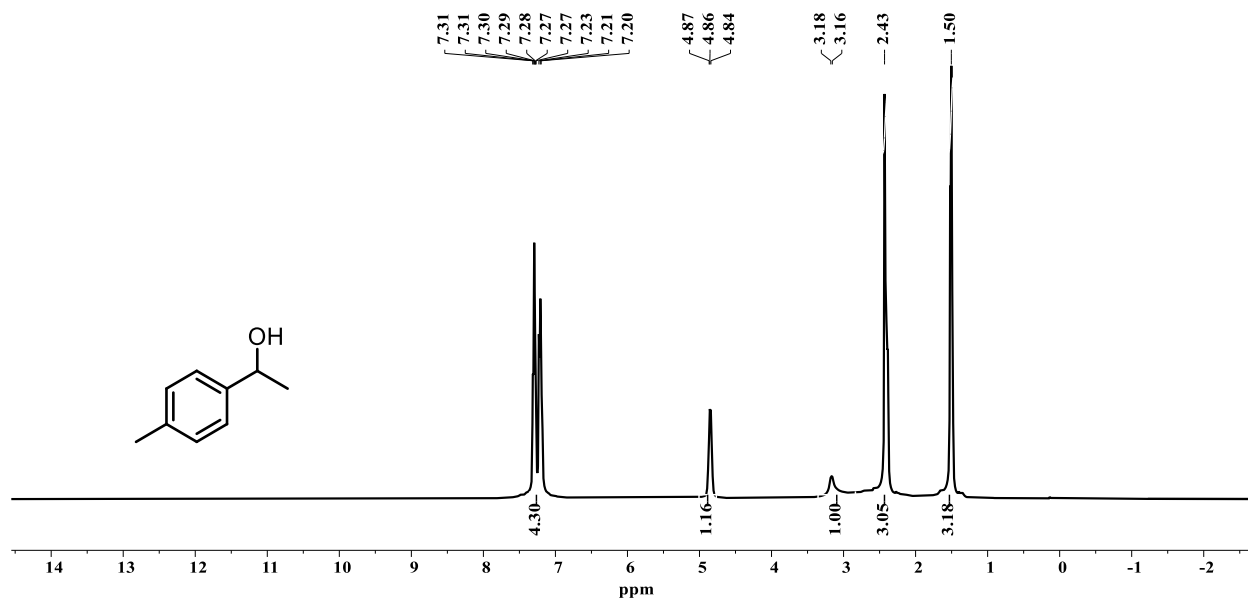

**Figure S47.**  $^1\text{H}$  NMR spectrum of **a2** in  $\text{CDCl}_3$  (400 MHz).

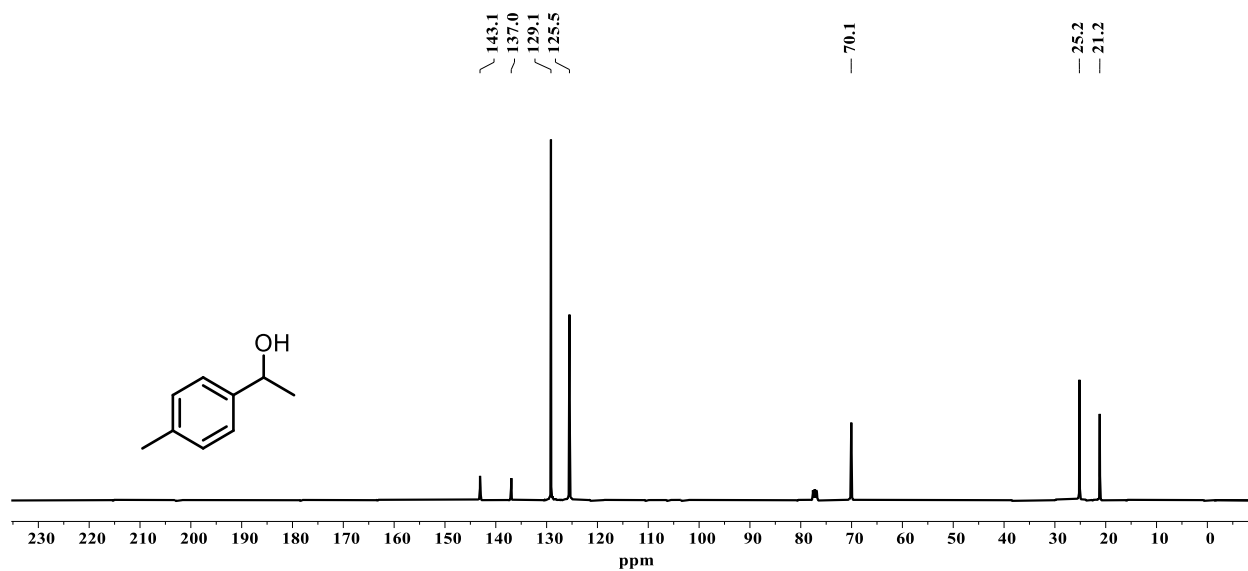

**Figure S48.**  $^{13}\text{C}\{^1\text{H}\}$  NMR spectrum of **a2** in  $\text{CDCl}_3$  (101 MHz).

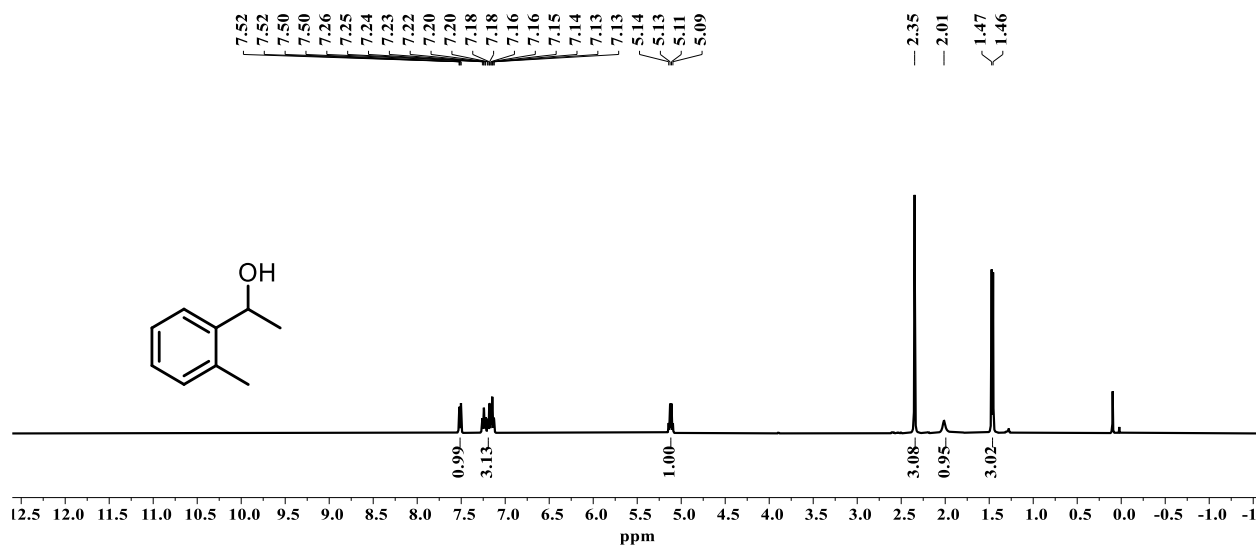

Figure S49.  $^1\text{H}$  NMR spectrum of **a3** in  $\text{CDCl}_3$  (400 MHz).

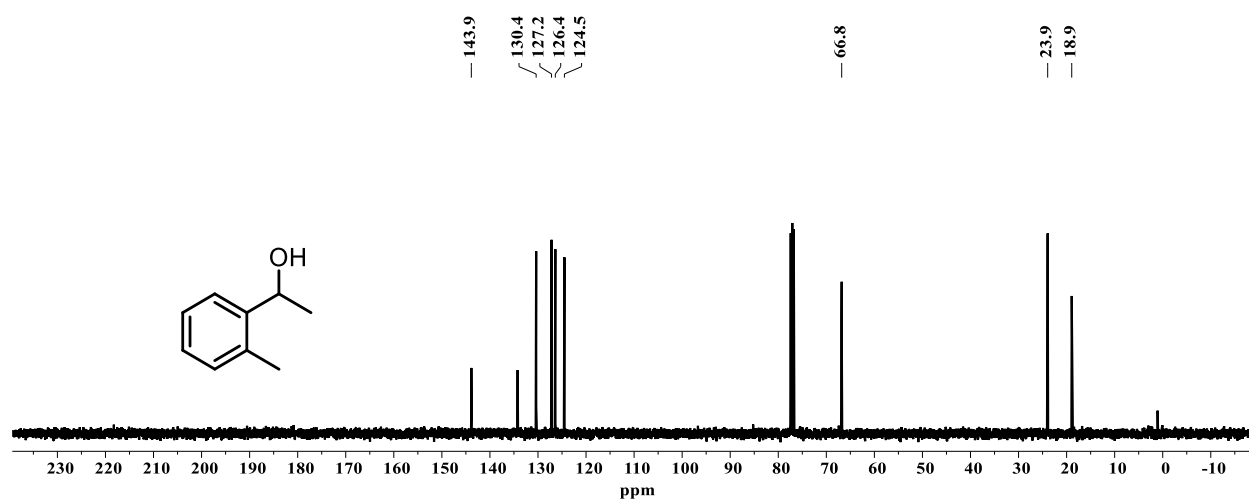

Figure S50.  $^{13}\text{C}\{^1\text{H}\}$  NMR spectrum of **a3** in  $\text{CDCl}_3$  (101 MHz).

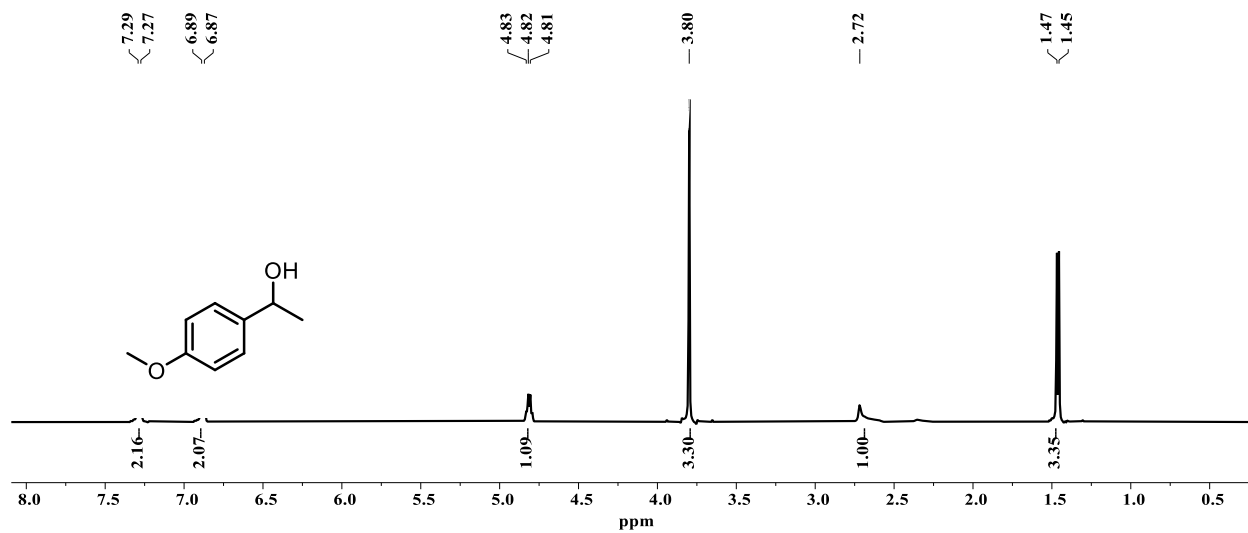

**Figure S51.**  $^1\text{H}$  NMR spectrum of **a4** in  $\text{CDCl}_3$  (500 MHz).

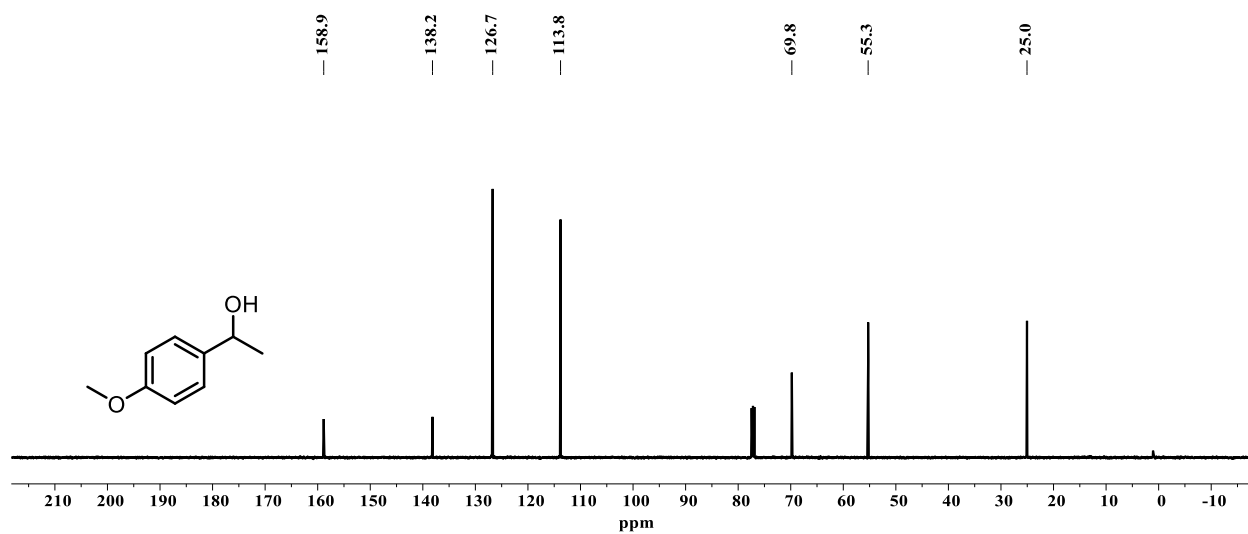

**Figure S52.**  $^{13}\text{C}\{^1\text{H}\}$  NMR spectrum of **a4** in  $\text{CDCl}_3$  (126 MHz).

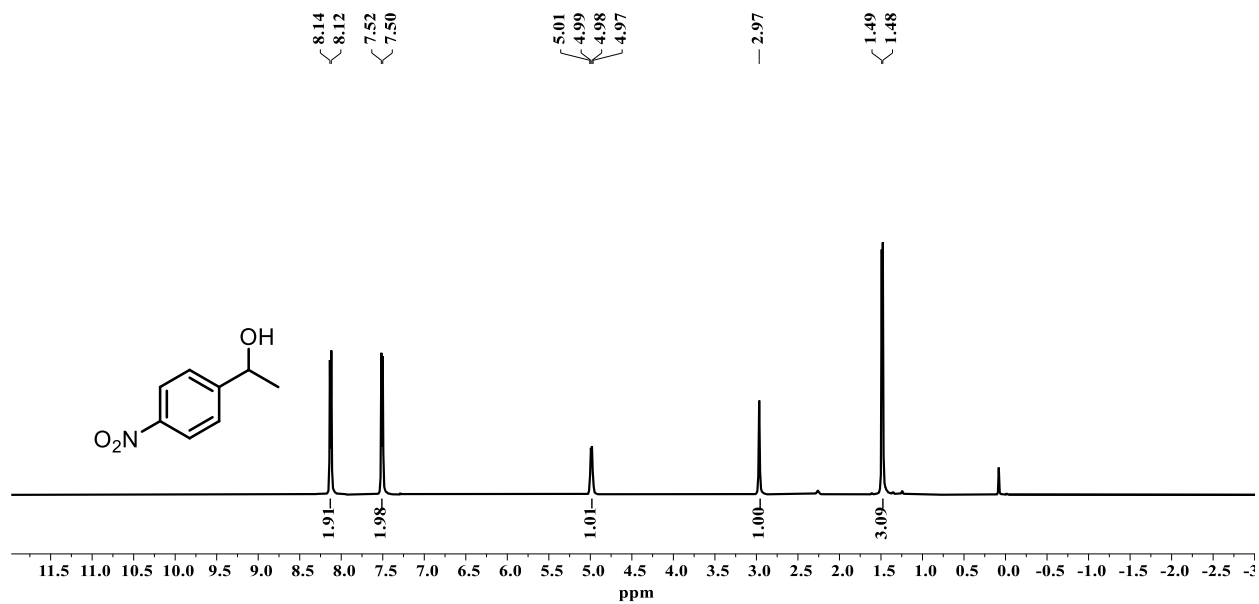

**Figure S53.**  $^1\text{H}$  NMR spectrum of **5a** in  $\text{CDCl}_3$  (500 MHz).

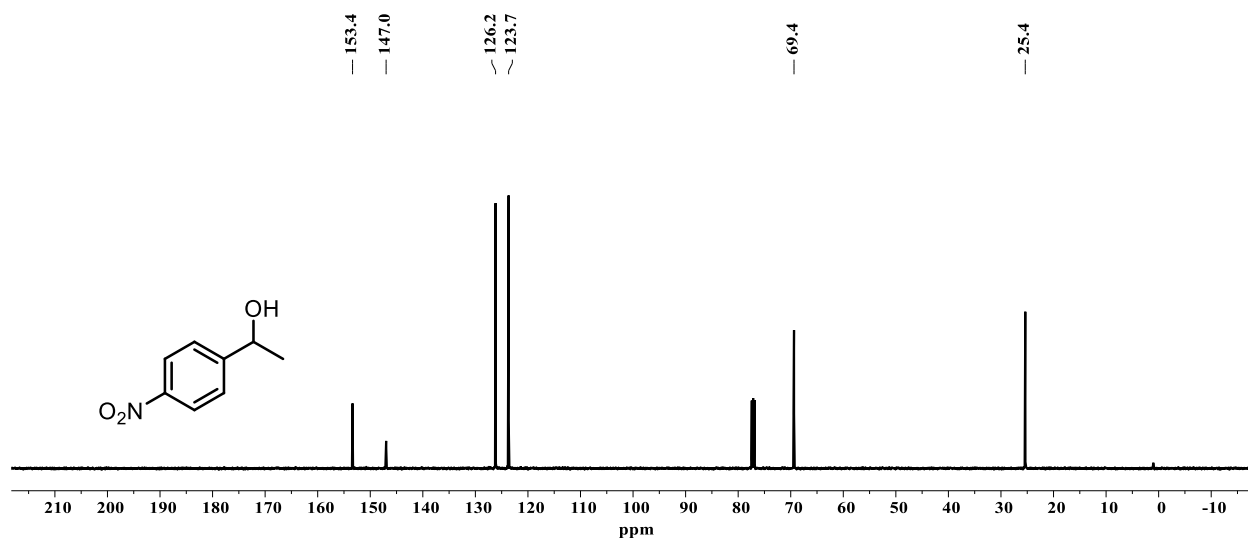

**Figure S54.**  $^{13}\text{C}\{^1\text{H}\}$  NMR spectrum of **5a** in  $\text{CDCl}_3$  (126 MHz).

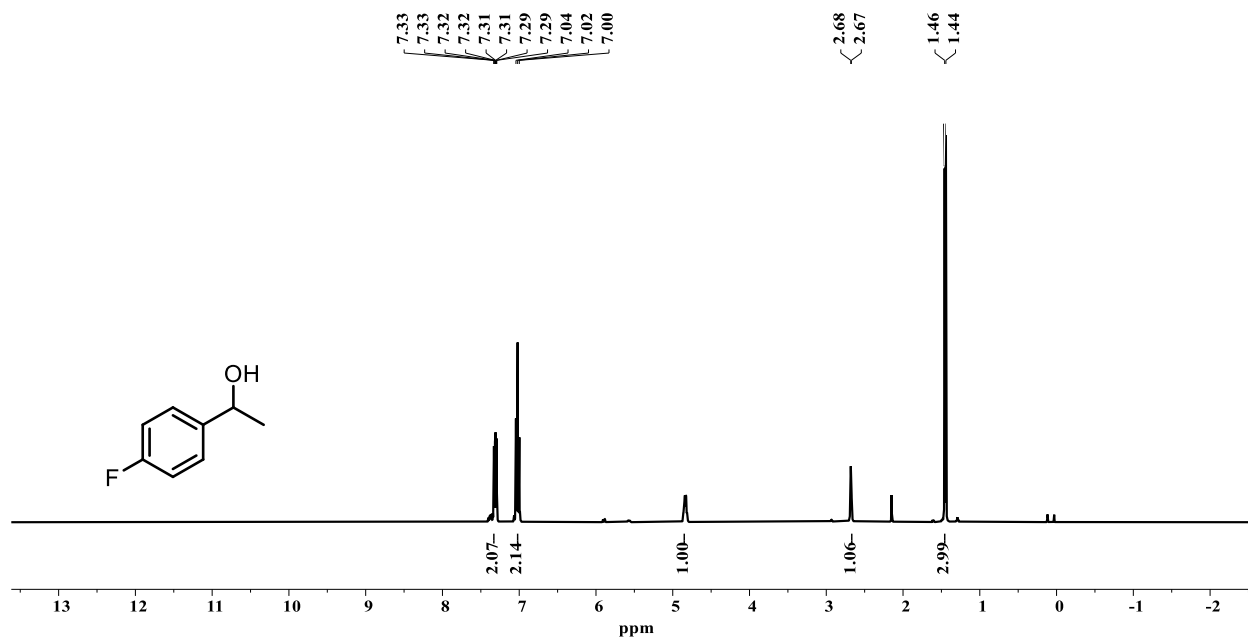

Figure S55.  $^1\text{H}$  NMR spectrum of **a**<sub>6</sub> in  $\text{CDCl}_3$  (400 MHz).

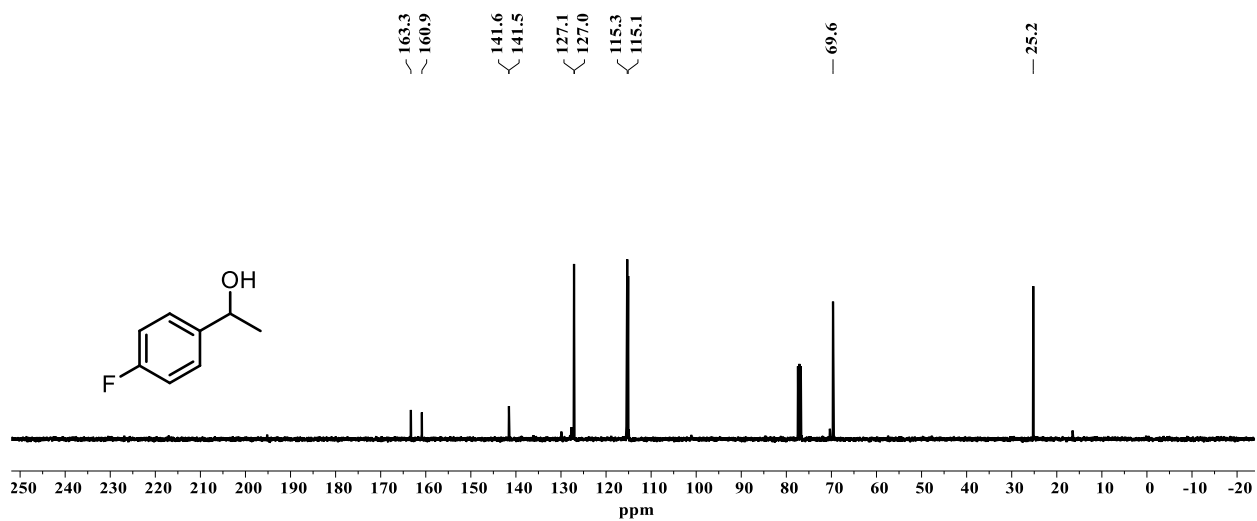

Figure S56.  $^{13}\text{C}\{^1\text{H}\}$  NMR spectrum of **a**<sub>6</sub> in  $\text{CDCl}_3$  (101 MHz).

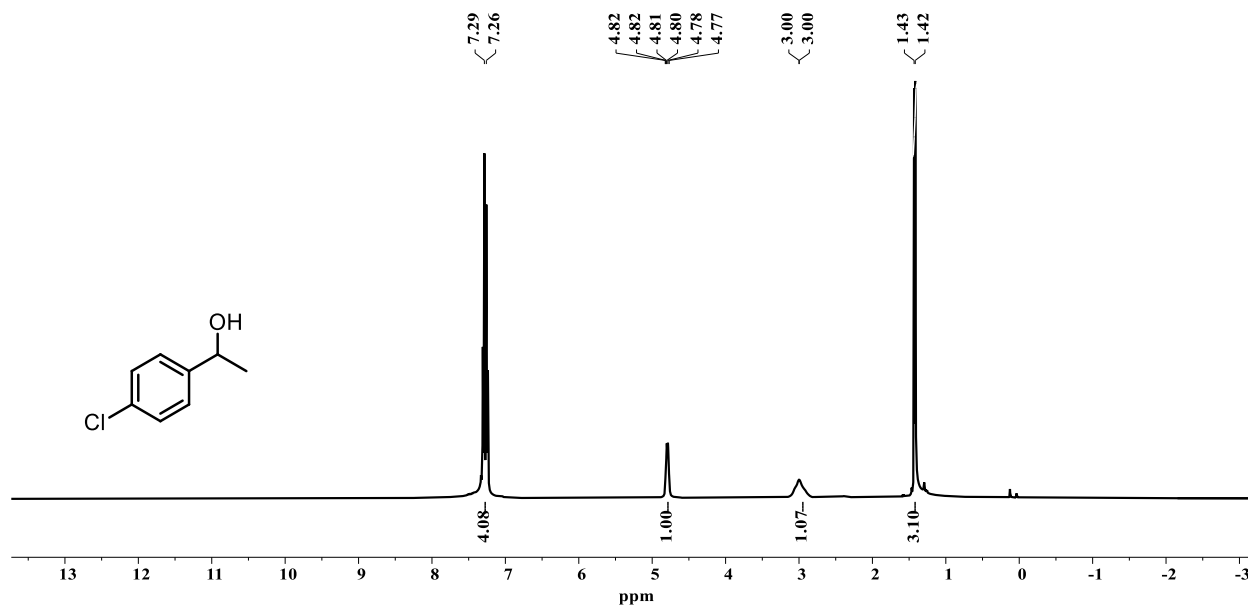

Figure S57.  $^1\text{H}$  NMR spectrum of **a7** in  $\text{CDCl}_3$  (400 MHz).

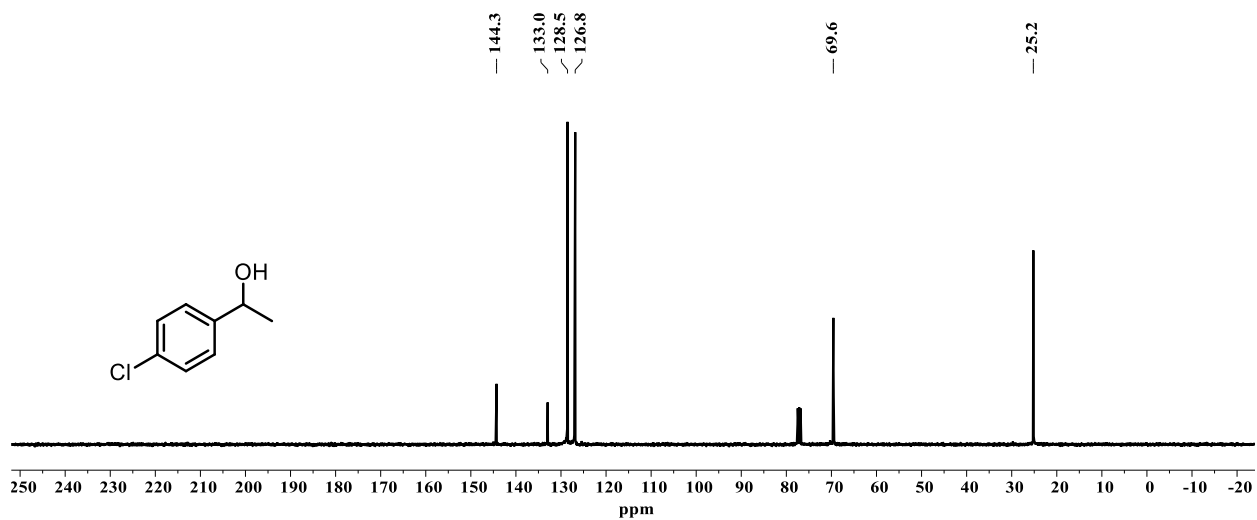

Figure S58.  $^{13}\text{C}\{^1\text{H}\}$  NMR spectrum of **a7** in  $\text{CDCl}_3$  (101 MHz).



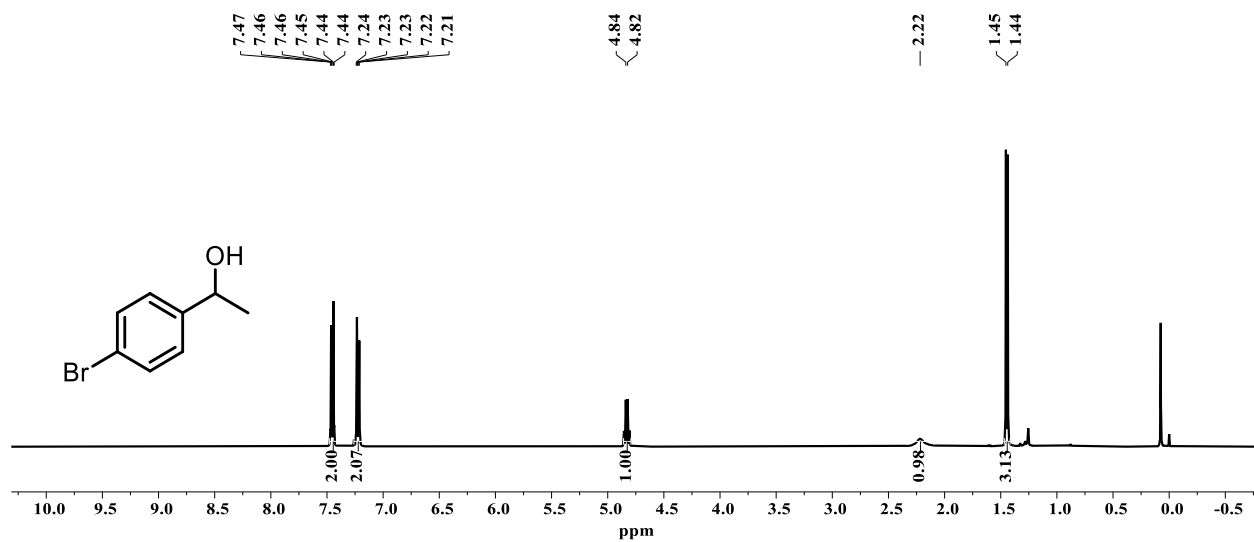

Figure S59.  $^1\text{H}$  NMR spectrum of **as** in  $\text{CDCl}_3$  (400 MHz).

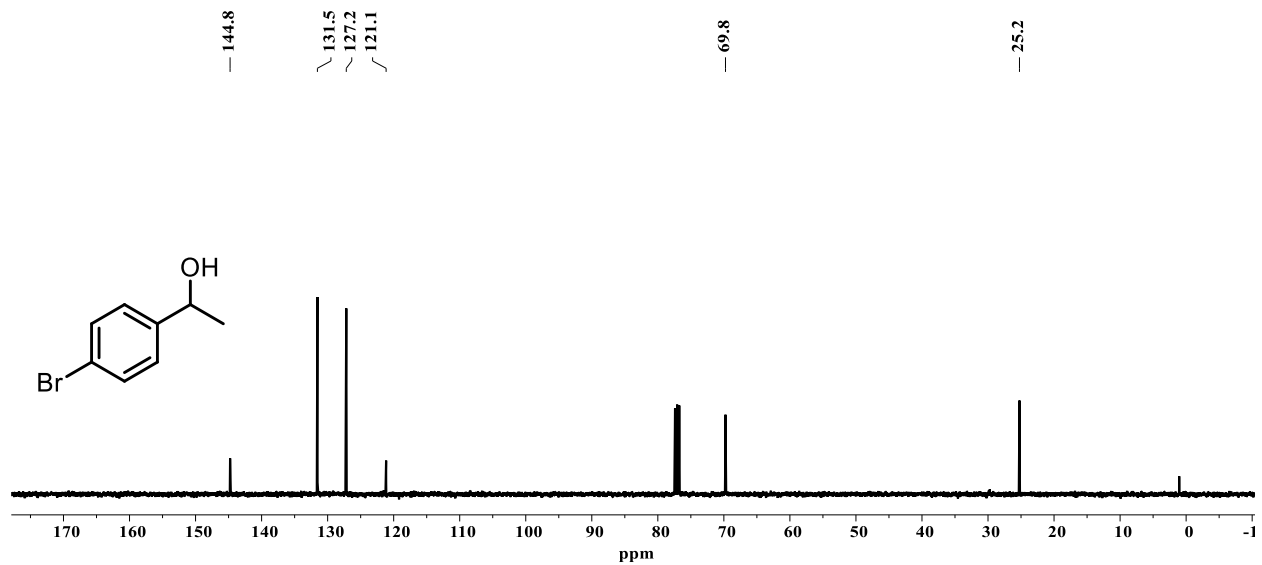

Figure S60.  $^{13}\text{C}\{^1\text{H}\}$  NMR spectrum of **as** in  $\text{CDCl}_3$  (101 MHz).

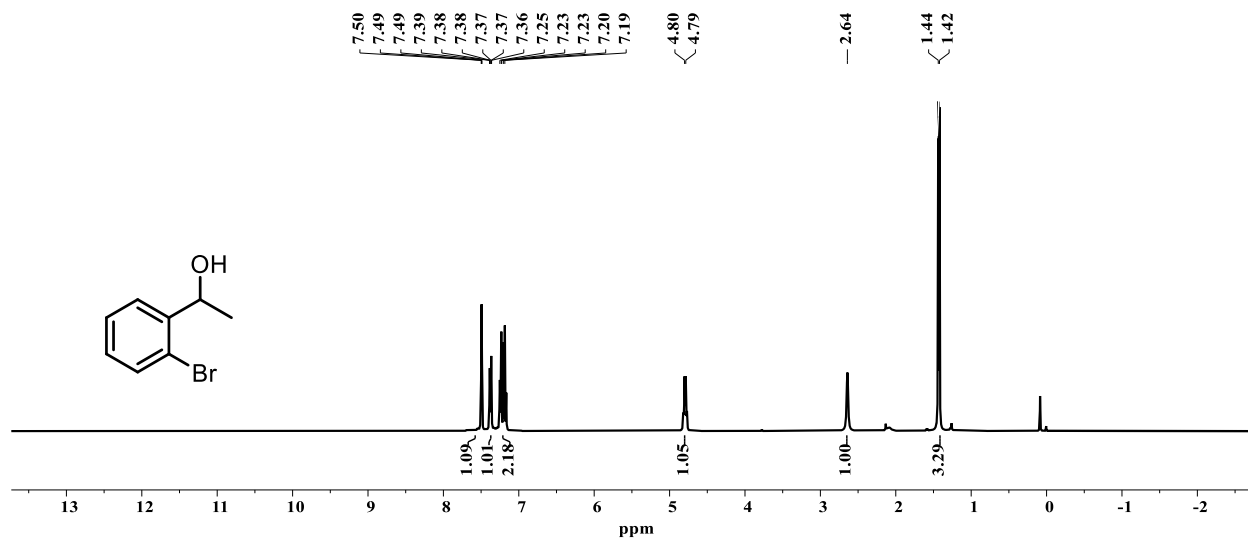

Figure S61.  $^1\text{H}$  NMR spectrum of **a9** in  $\text{CDCl}_3$  (400 MHz).

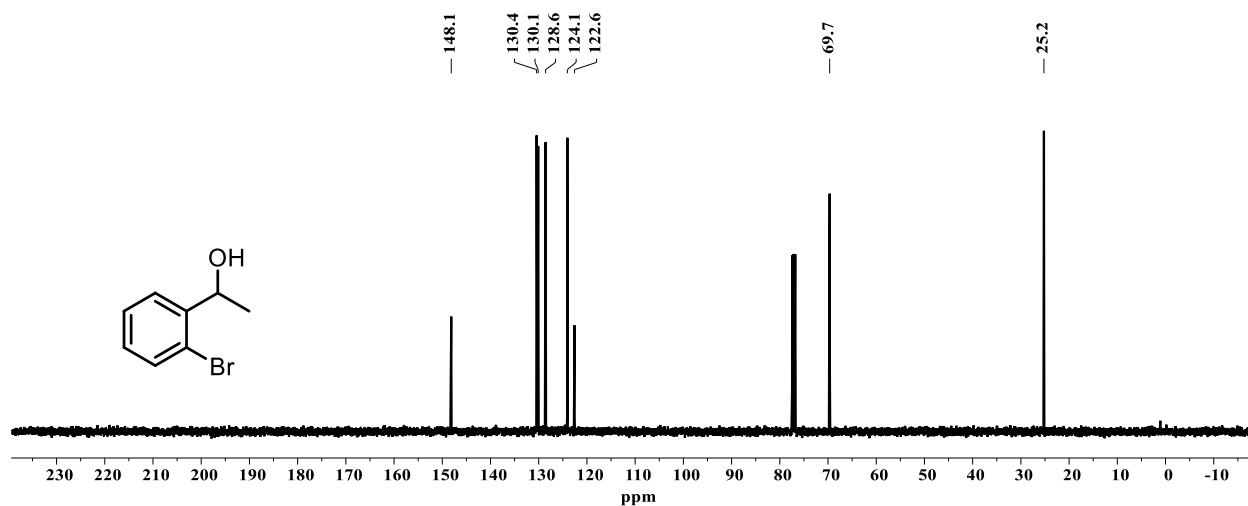

Figure S62.  $^{13}\text{C}\{^1\text{H}\}$  NMR spectrum of **a9** in  $\text{CDCl}_3$  (101 MHz).

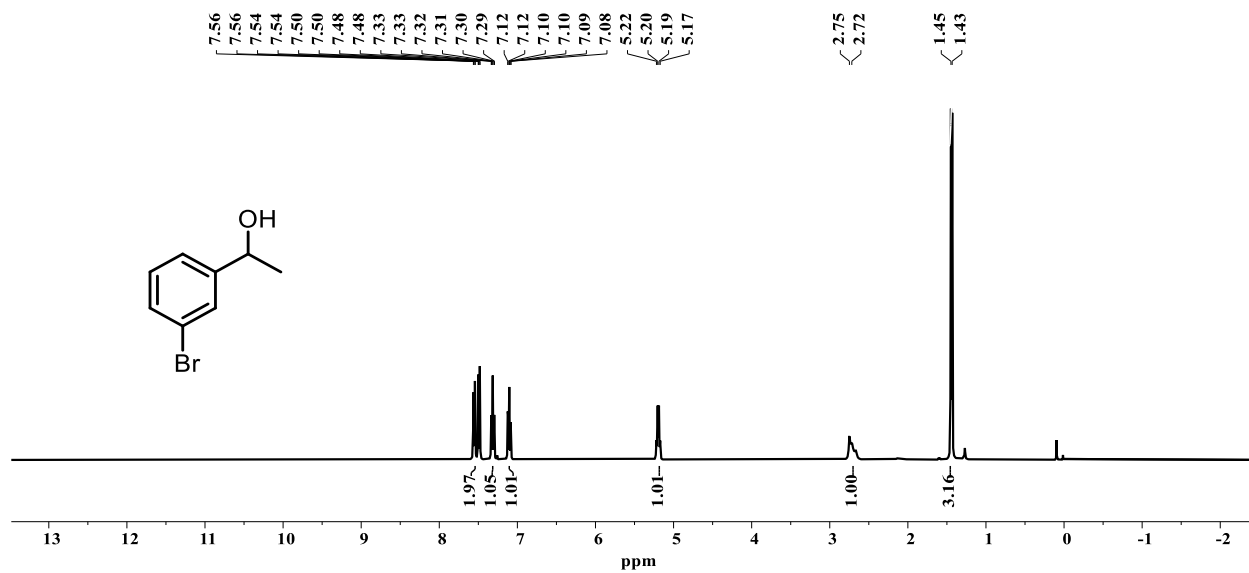

Figure S63.  $^1\text{H}$  NMR spectrum of **a10** in  $\text{CDCl}_3$  (400 MHz).

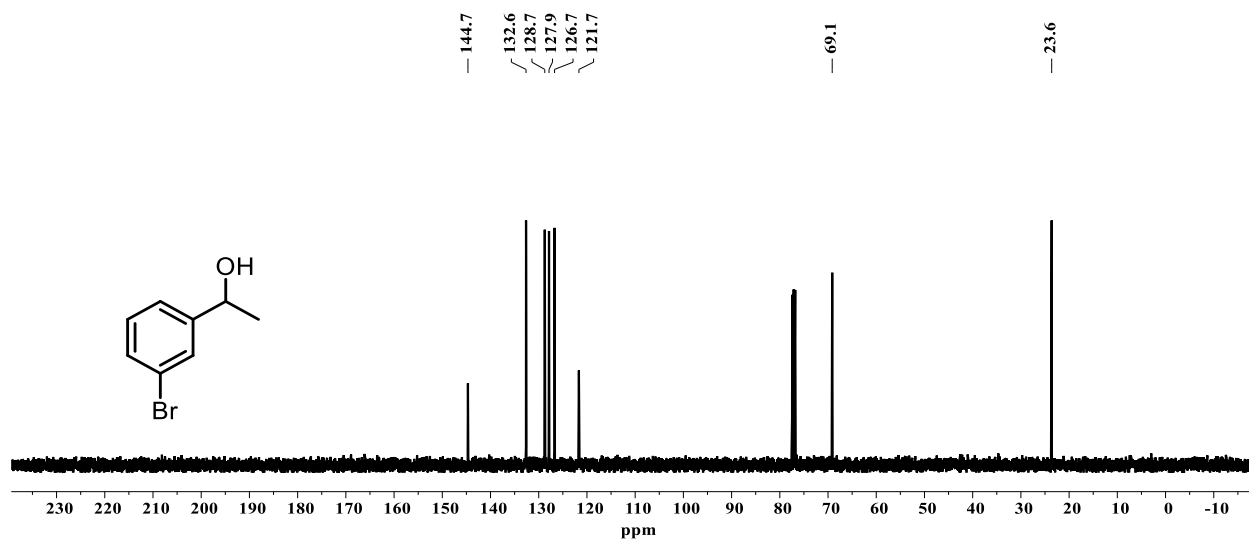

Figure S64.  $^{13}\text{C}\{^1\text{H}\}$  NMR spectrum of **a10** in  $\text{CDCl}_3$  (101 MHz).

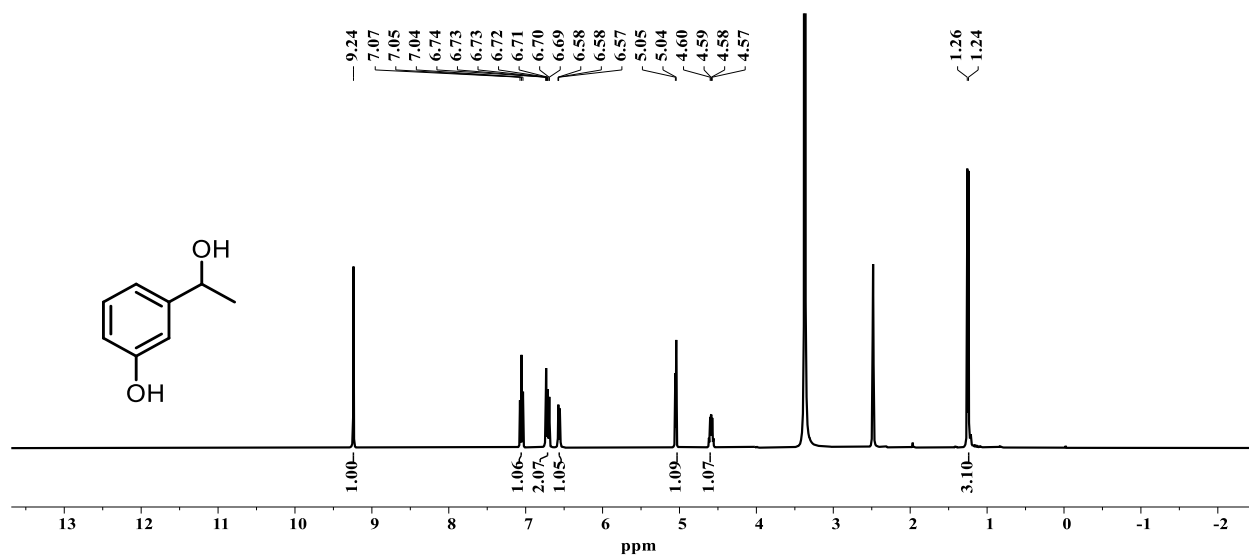

Figure S65. <sup>1</sup>H NMR spectrum of a<sub>11</sub> in CDCl<sub>3</sub> (400 MHz).

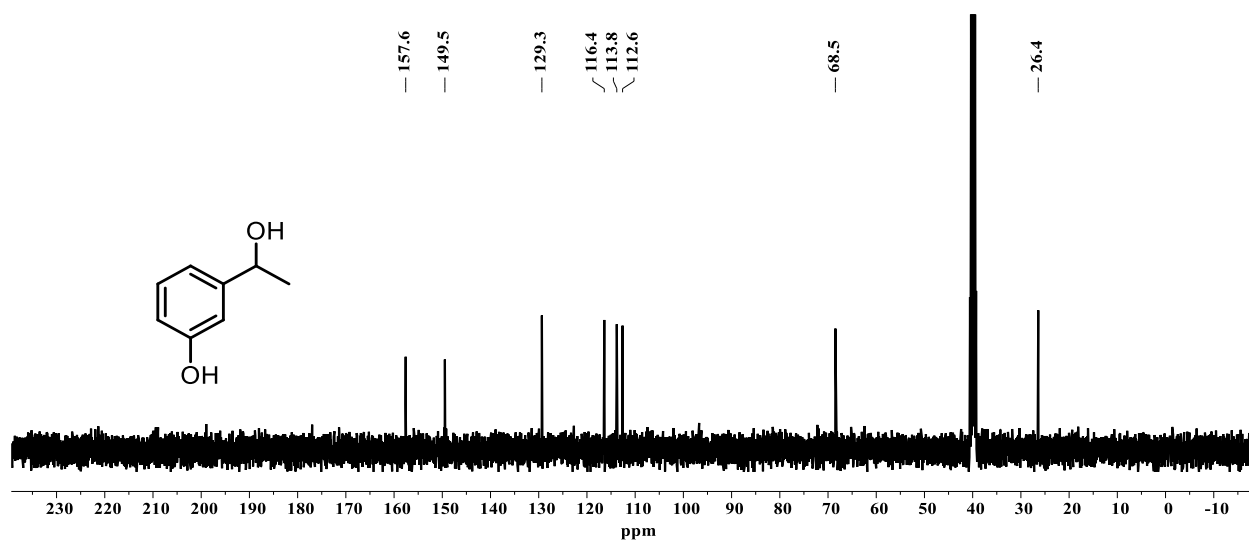

Figure S66. <sup>13</sup>C {<sup>1</sup>H} NMR spectrum of a<sub>11</sub> in CDCl<sub>3</sub> (101 MHz).

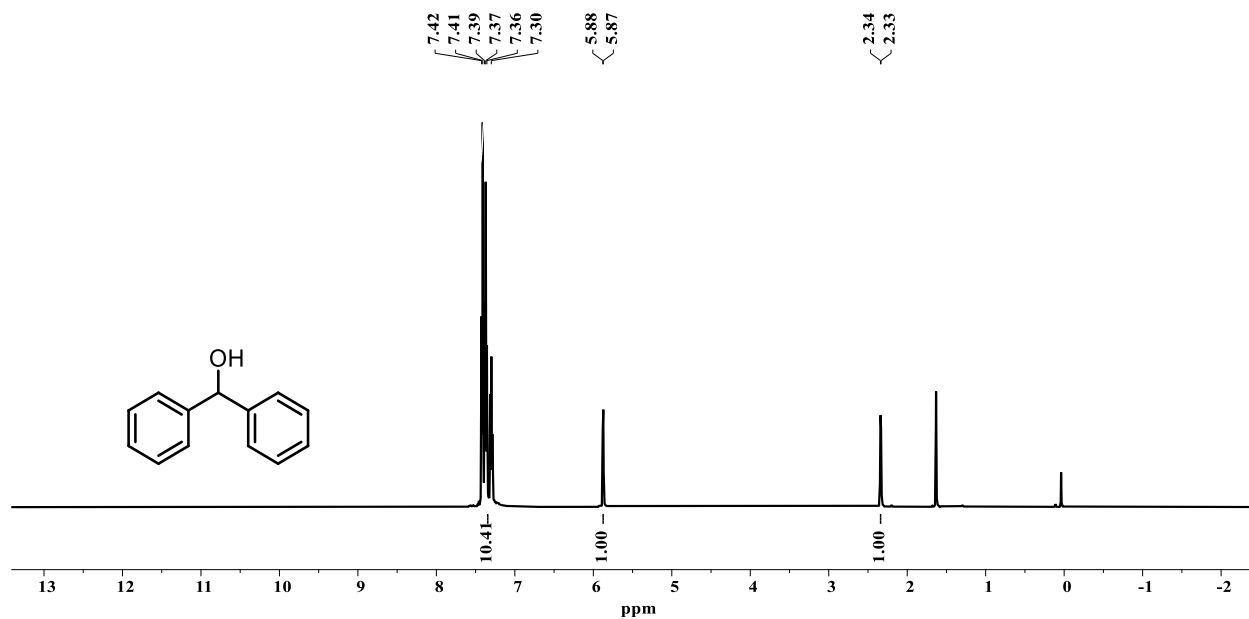

Figure S67.  $^1\text{H}$  NMR spectrum of **a12** in  $\text{CDCl}_3$  (500 MHz).

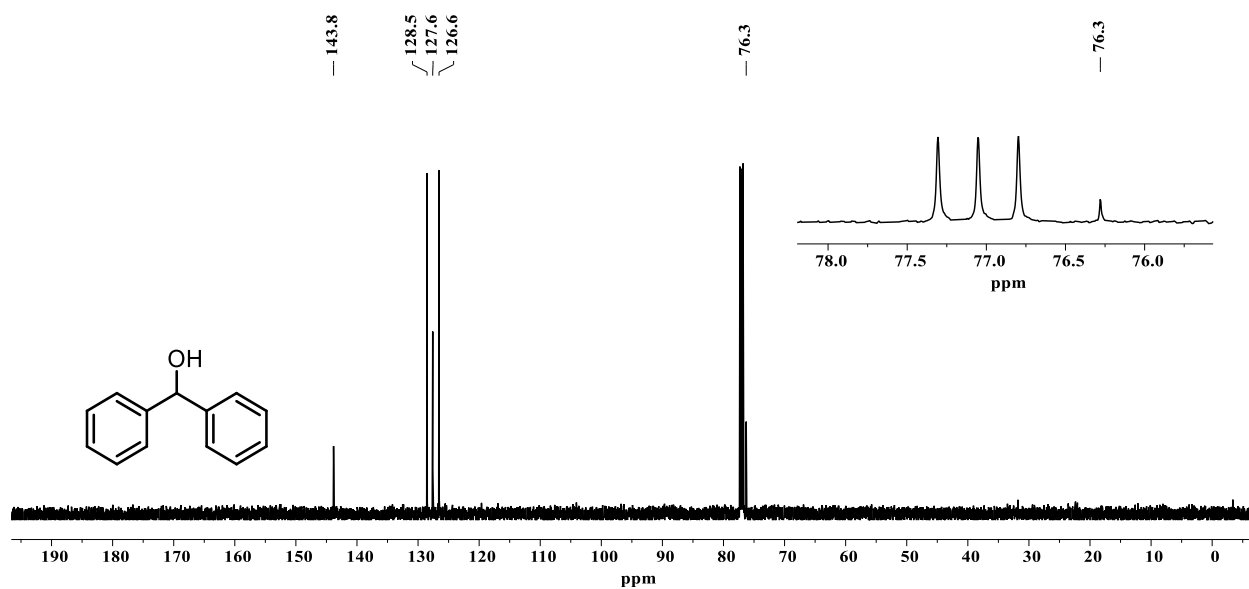

Figure S68.  $^{13}\text{C}\{^1\text{H}\}$  NMR spectrum of **a12** in  $\text{CDCl}_3$  (126 MHz).

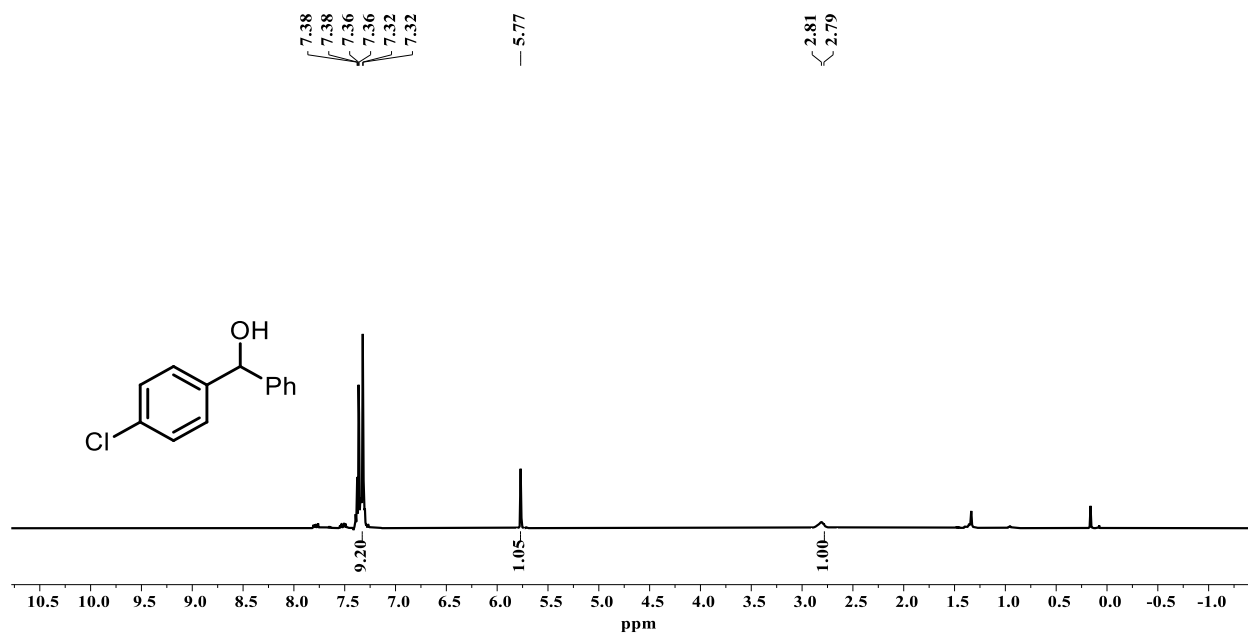

**Figure S69.**  $^1\text{H}$  NMR spectrum of **a13** in  $\text{CDCl}_3$  (500 MHz).

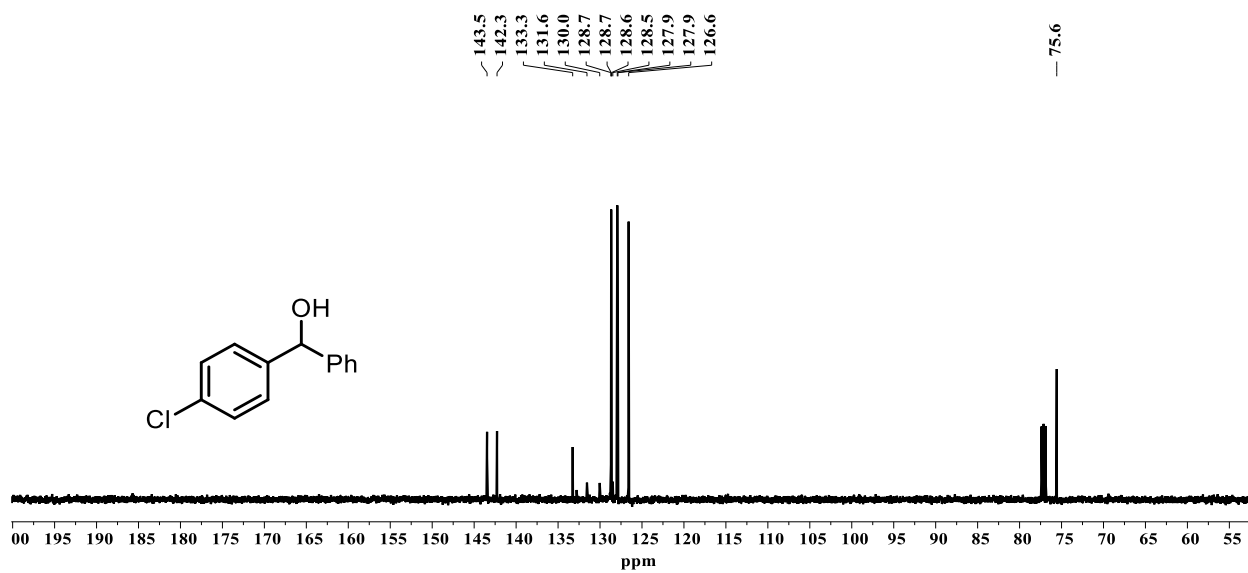

**Figure S70.**  $^{13}\text{C}\{^1\text{H}\}$  NMR spectrum of **a13** in  $\text{CDCl}_3$  (126 MHz).

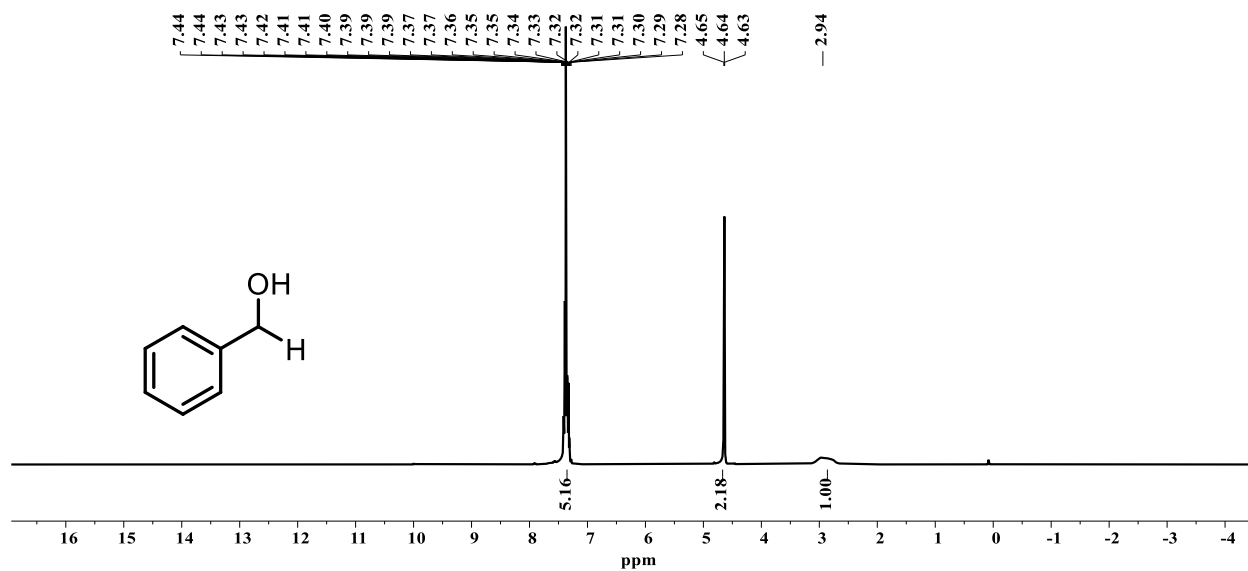

Figure S71.  $^1\text{H}$  NMR spectrum of **a14** in  $\text{CDCl}_3$  (400 MHz).

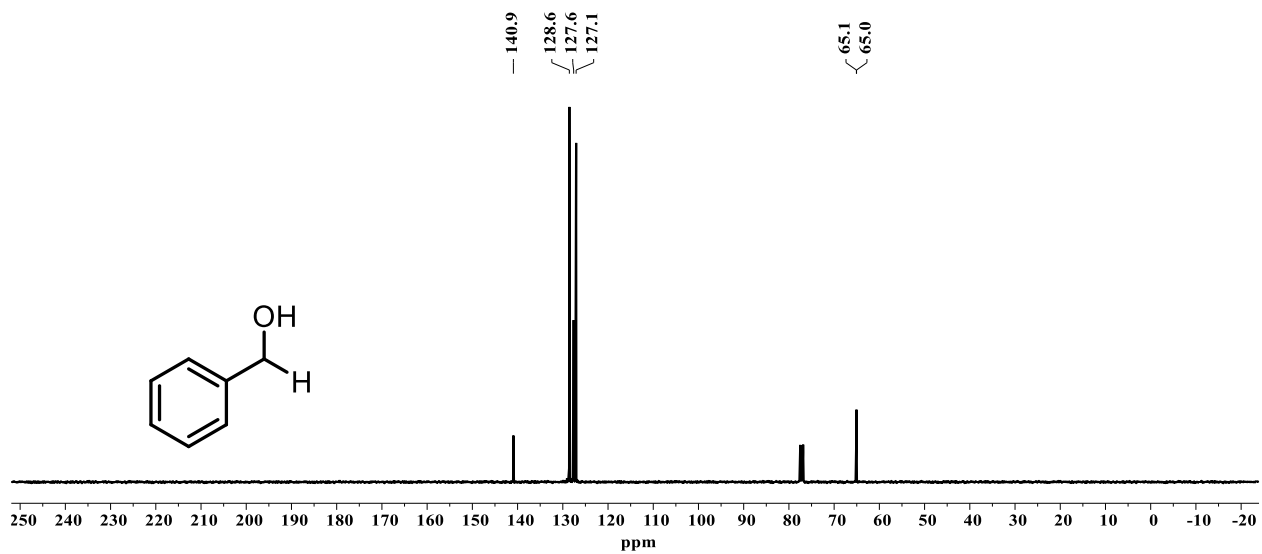

Figure S72.  $^{13}\text{C}\{^1\text{H}\}$  NMR spectrum of **a14** in  $\text{CDCl}_3$  (101 MHz).

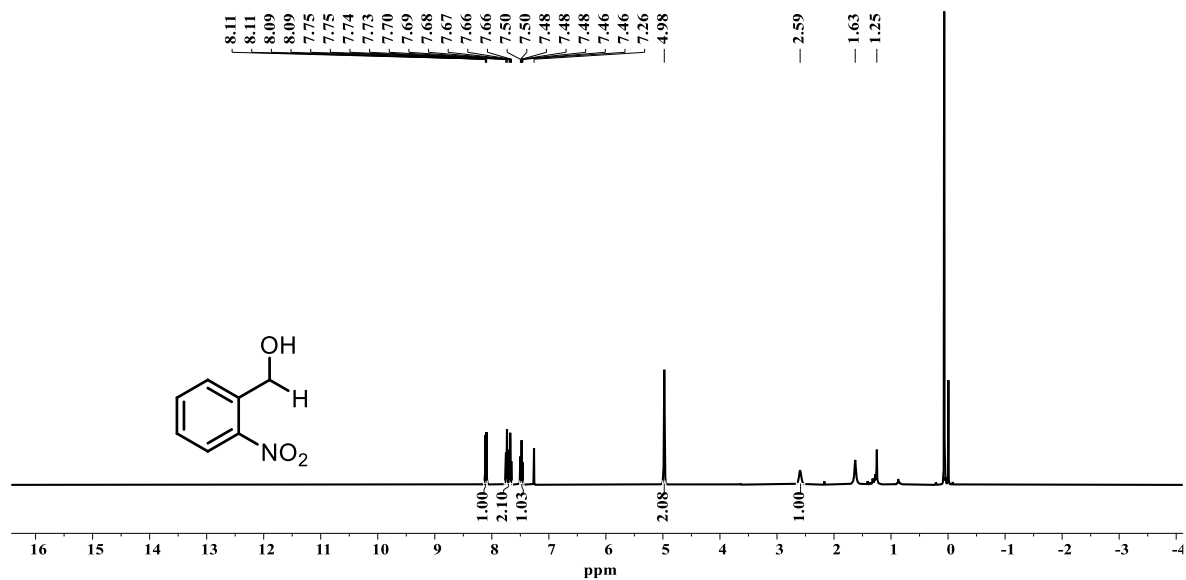

Figure S73.  $^1\text{H}$  NMR spectrum of **a15** in  $\text{CDCl}_3$  (400 MHz).

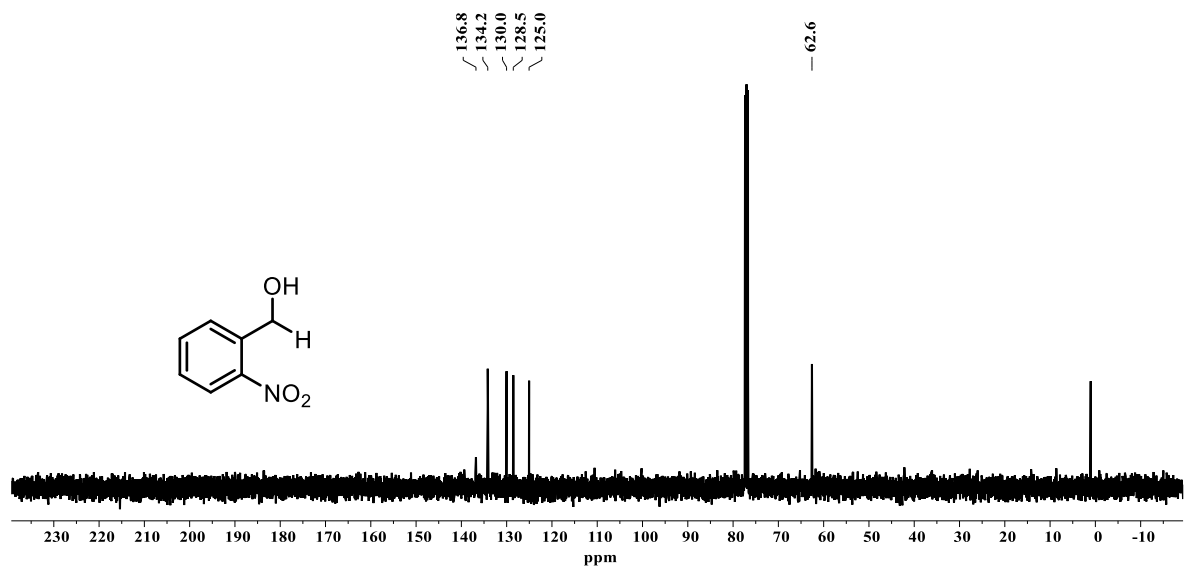

Figure S74.  $^{13}\text{C}\{^1\text{H}\}$  NMR spectrum of **a15** in  $\text{CDCl}_3$  (101 MHz).

## References

1. O. V. Dolomanov, L. J. Bourhis, R. J. Gildea, J. A. K. Howard and H. Puschmann, *J. Appl. Cryst.*, 2009, **42**, 339-341.
2. G. Sheldrick, *Acta Cryst.*, 2015, **71**, 3-8.
3. G. Sheldrick, *Acta Cryst.*, 2008, **64**, 112-122.
4. J. W. Faller, B. P. Patel, M. A. Albrizzio and M. Curtis, *Organometallics*, 1999, **18**, 3096-3104.
